# Supplementary material for: Potent Xanthine Oxidase Inhibitory Activity of Constituents of Agastache rugosa (Fisch. and C.A.Mey.) Kuntze
Source: MDPI journal article supplement (doi:10.3390/foods12030573), 2023-01-28
Supplement: s1 [file s1]

# Supplementary Materials

## Potent xanthine oxidase inhibitory activity of constituents of *Agastache rugosa* (Fisch. & C.A.Mey.) Kuntze

Heung Joo Yuk <sup>1</sup>, HyungWon Ryu <sup>2,\*</sup> and Dong-Seon Kim <sup>1,\*</sup>

|                                                                                         |       |
|-----------------------------------------------------------------------------------------|-------|
| <b>Title page</b> .....                                                                 | 1     |
| <b>Figure S1–4.</b> <sup>1</sup> H-NMR spectrum of compounds (1–7) .....                | 2–8   |
| <b>Figure S5–8.</b> <sup>13</sup> C-NMR spectrum of compounds (1–7) .....               | 9–15  |
| <b>Figure S9–12.</b> Identification of compounds (1–7) by UPLC-Q-TOF MS .....           | 16–22 |
| <b>Table S1.</b> <sup>1</sup> H- and <sup>13</sup> C-NMR assign of compounds (1–7)..... | 23    |

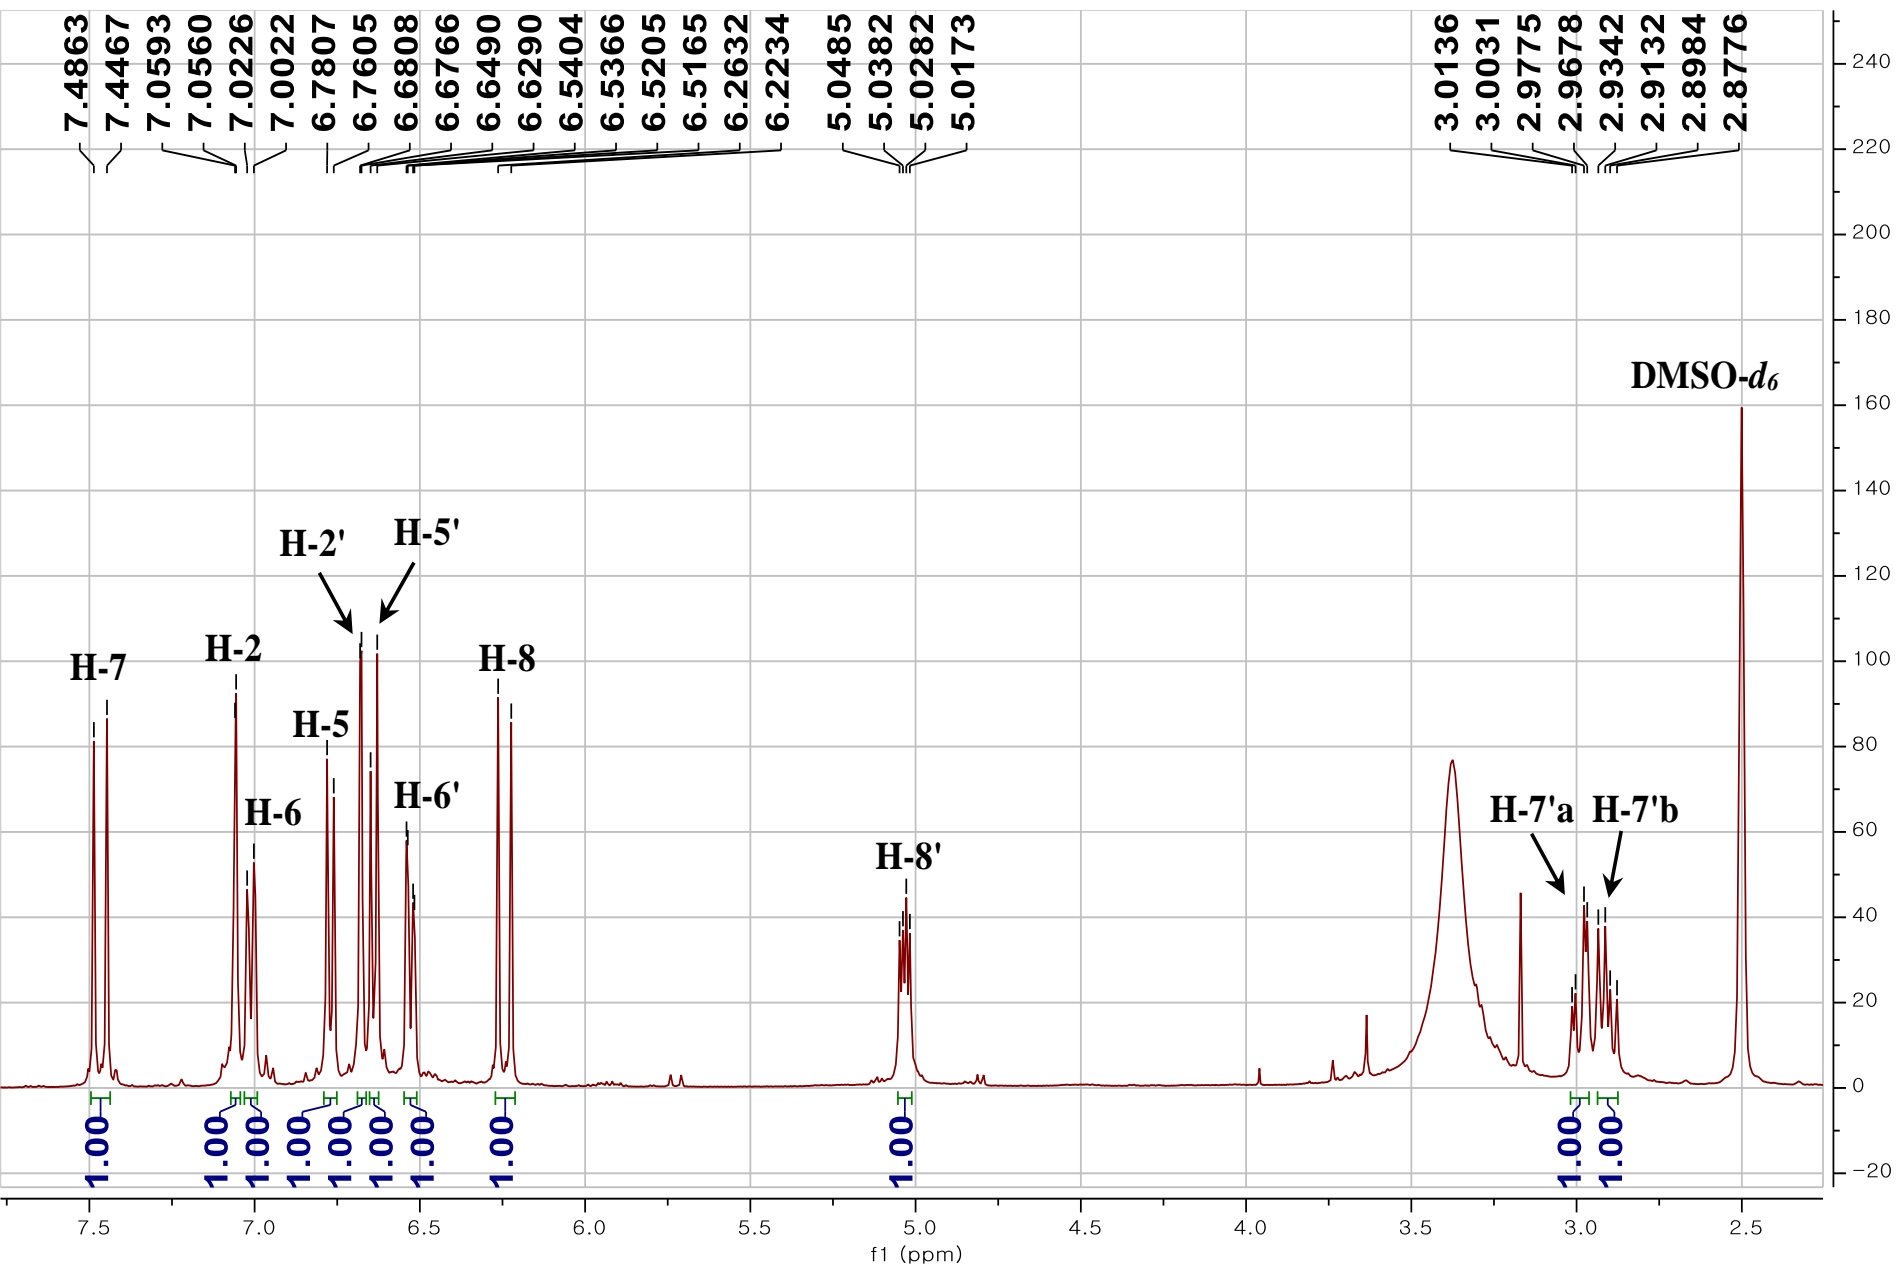

**Figure S1.** The <sup>1</sup>H NMR spectrum of compound **1** (400 MHz, DMSO-*d*<sub>6</sub>).

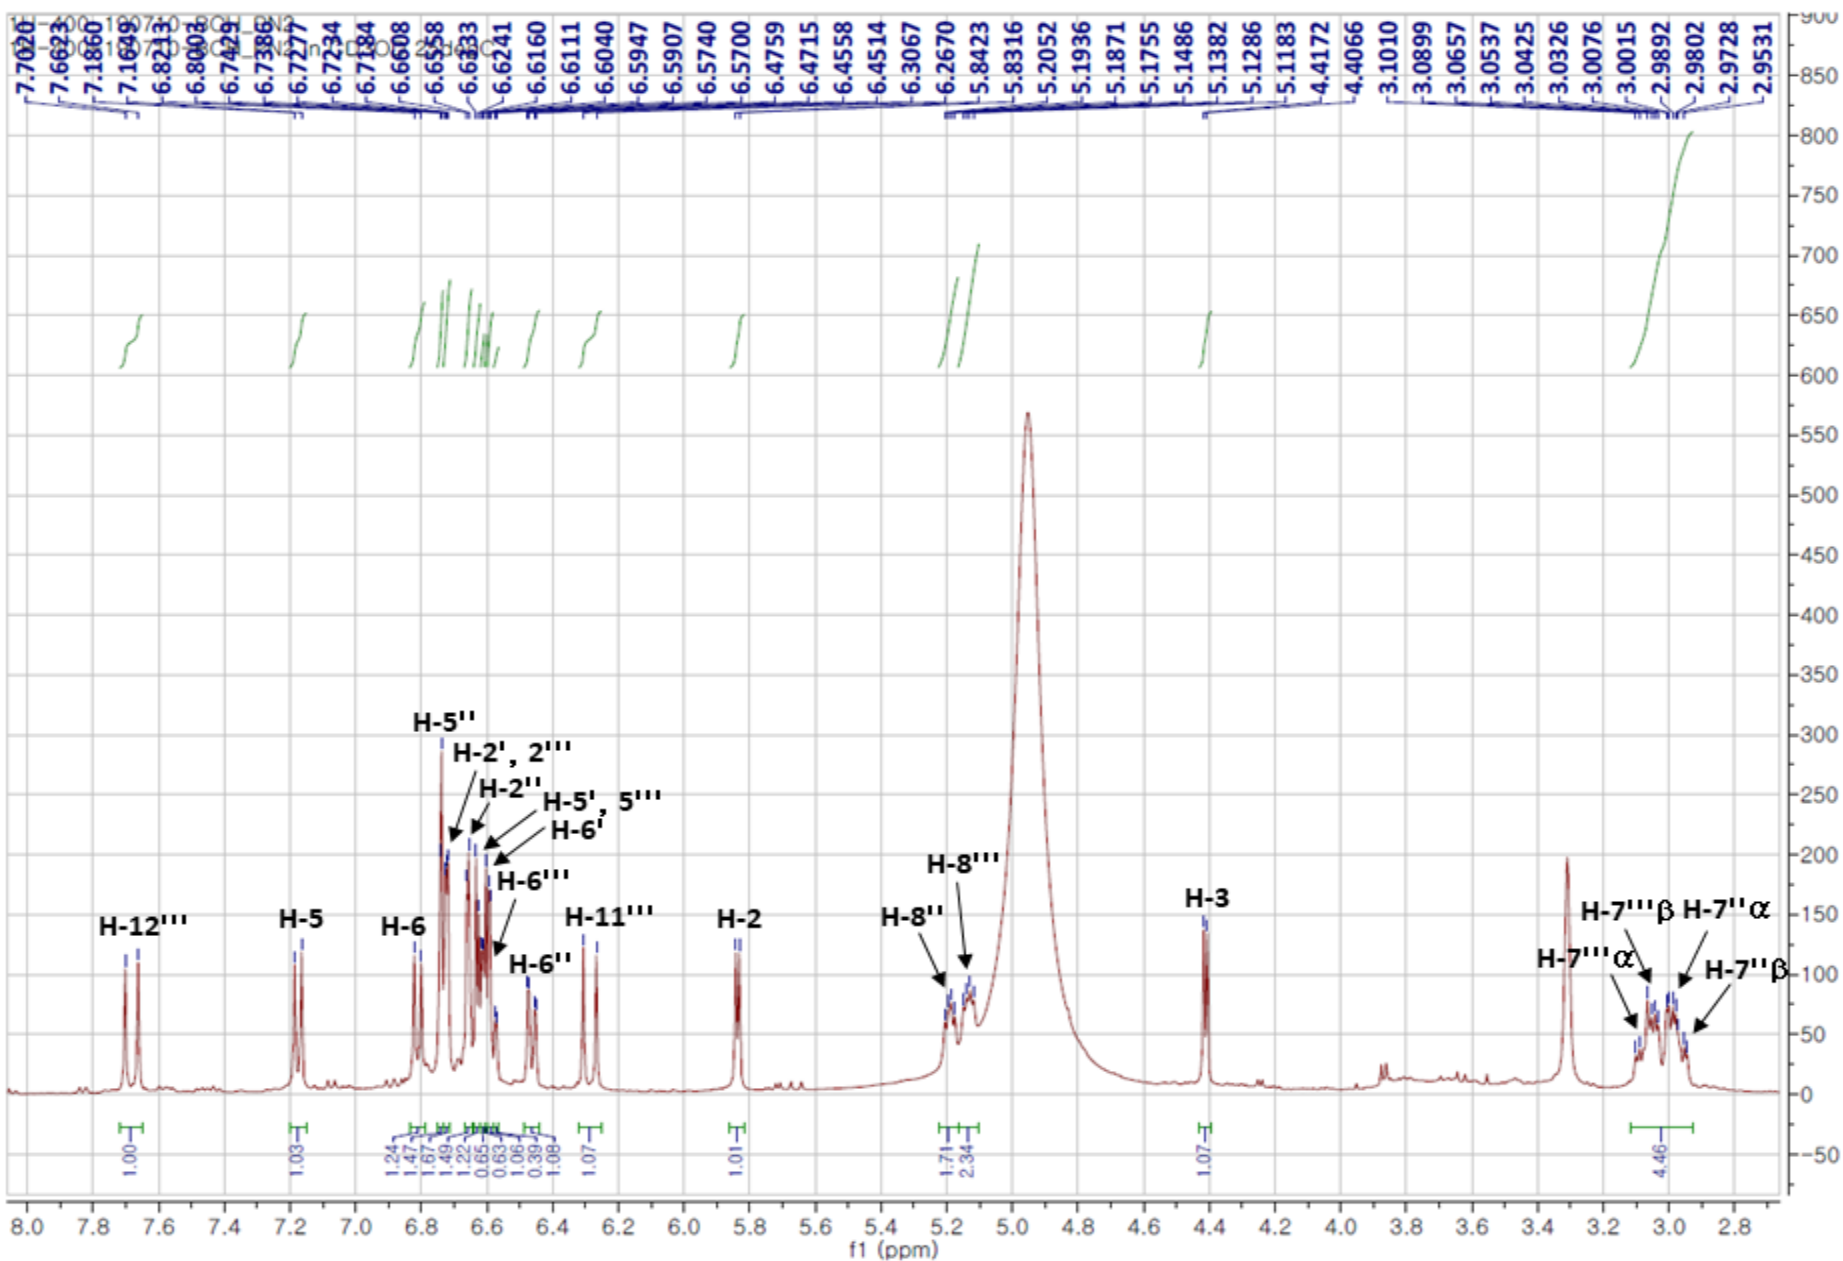

**Figure S2.** The  $^1\text{H}$  NMR spectrum of compound **2** (500 MHz,  $\text{CD}_3\text{OD}$ ).

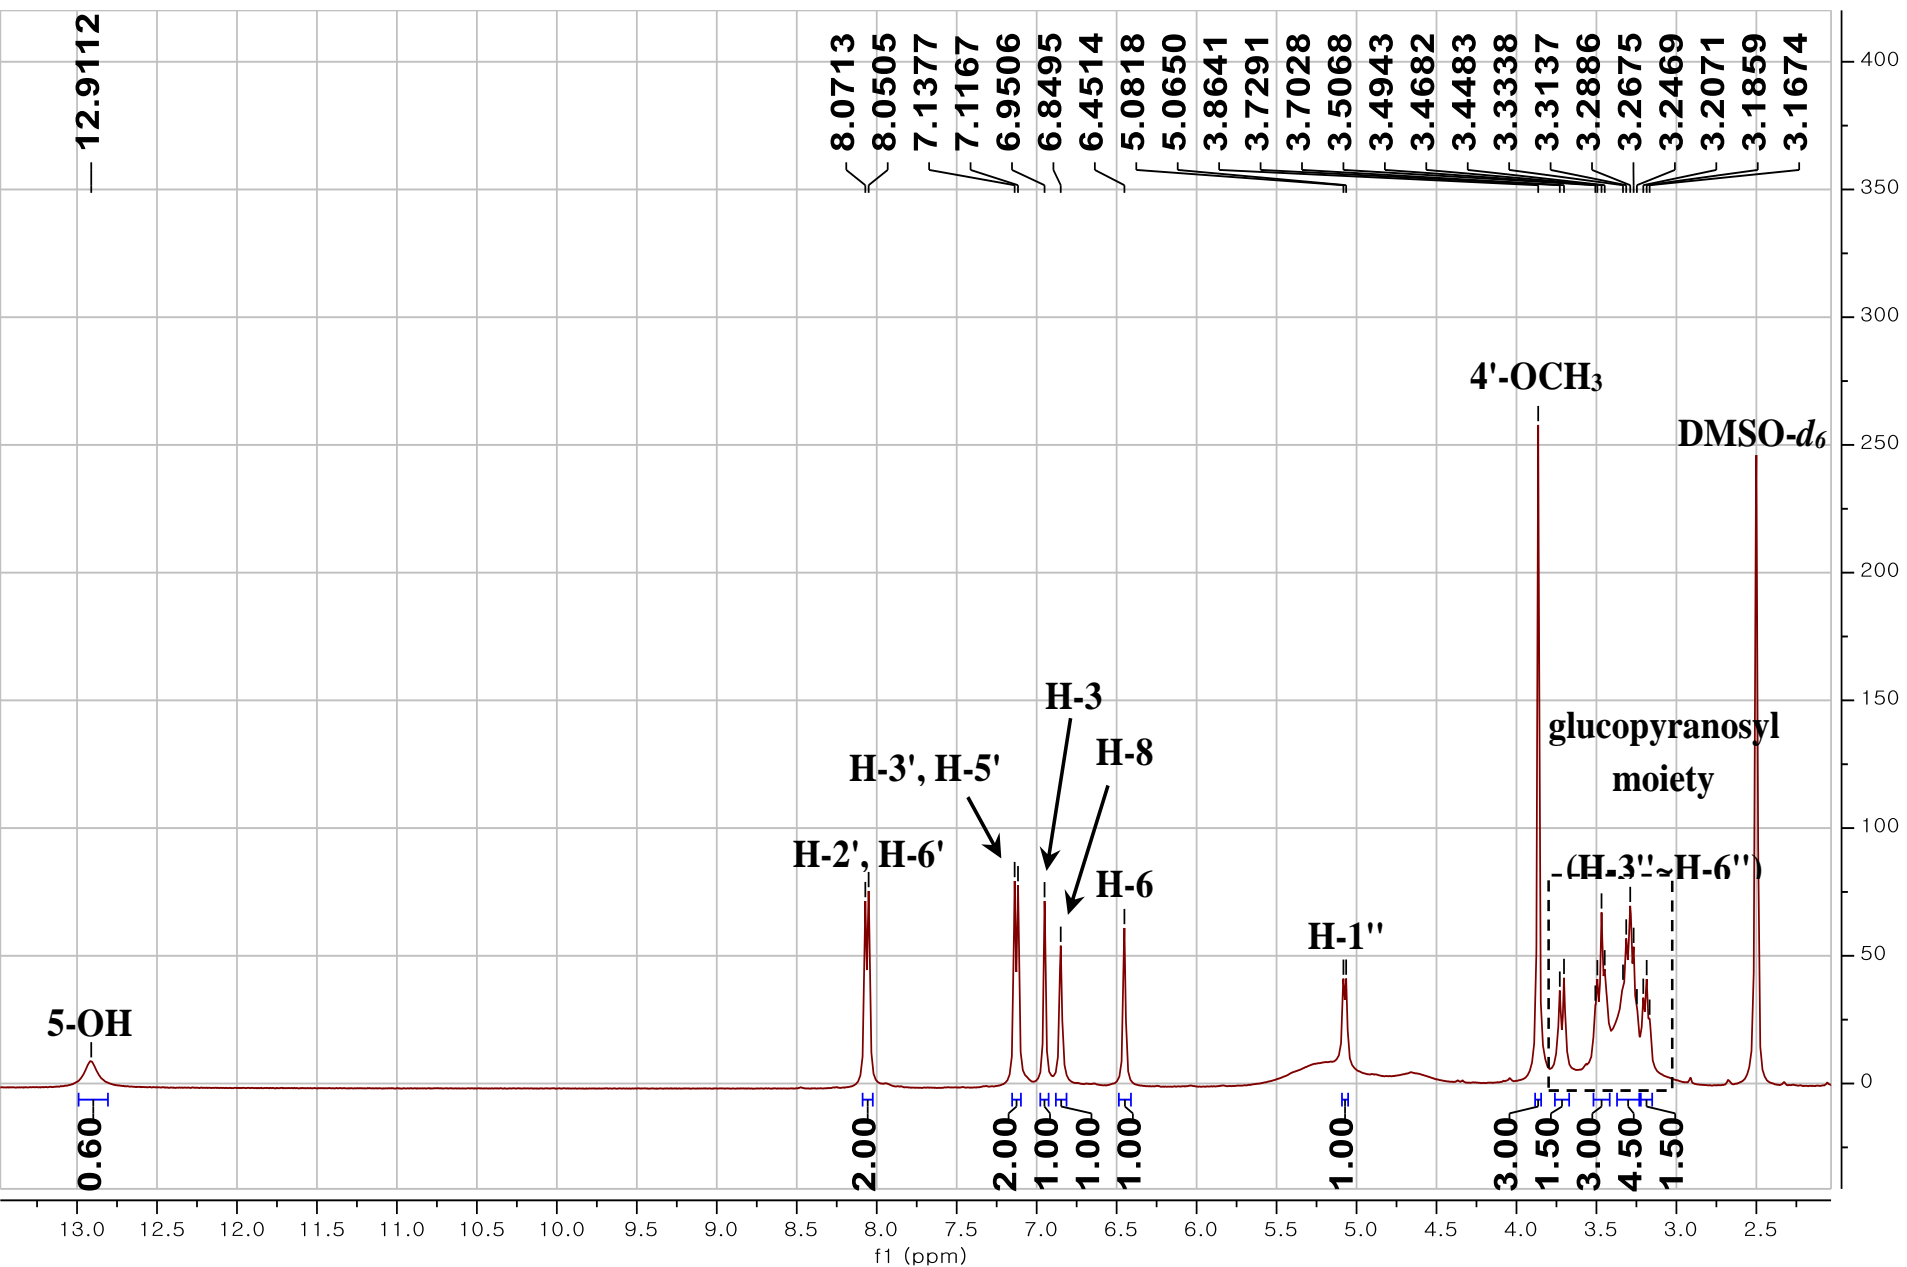

**Figure S3.** The <sup>1</sup>H NMR spectrum of compound **3** (400 MHz, DMSO-*d*<sub>6</sub>).

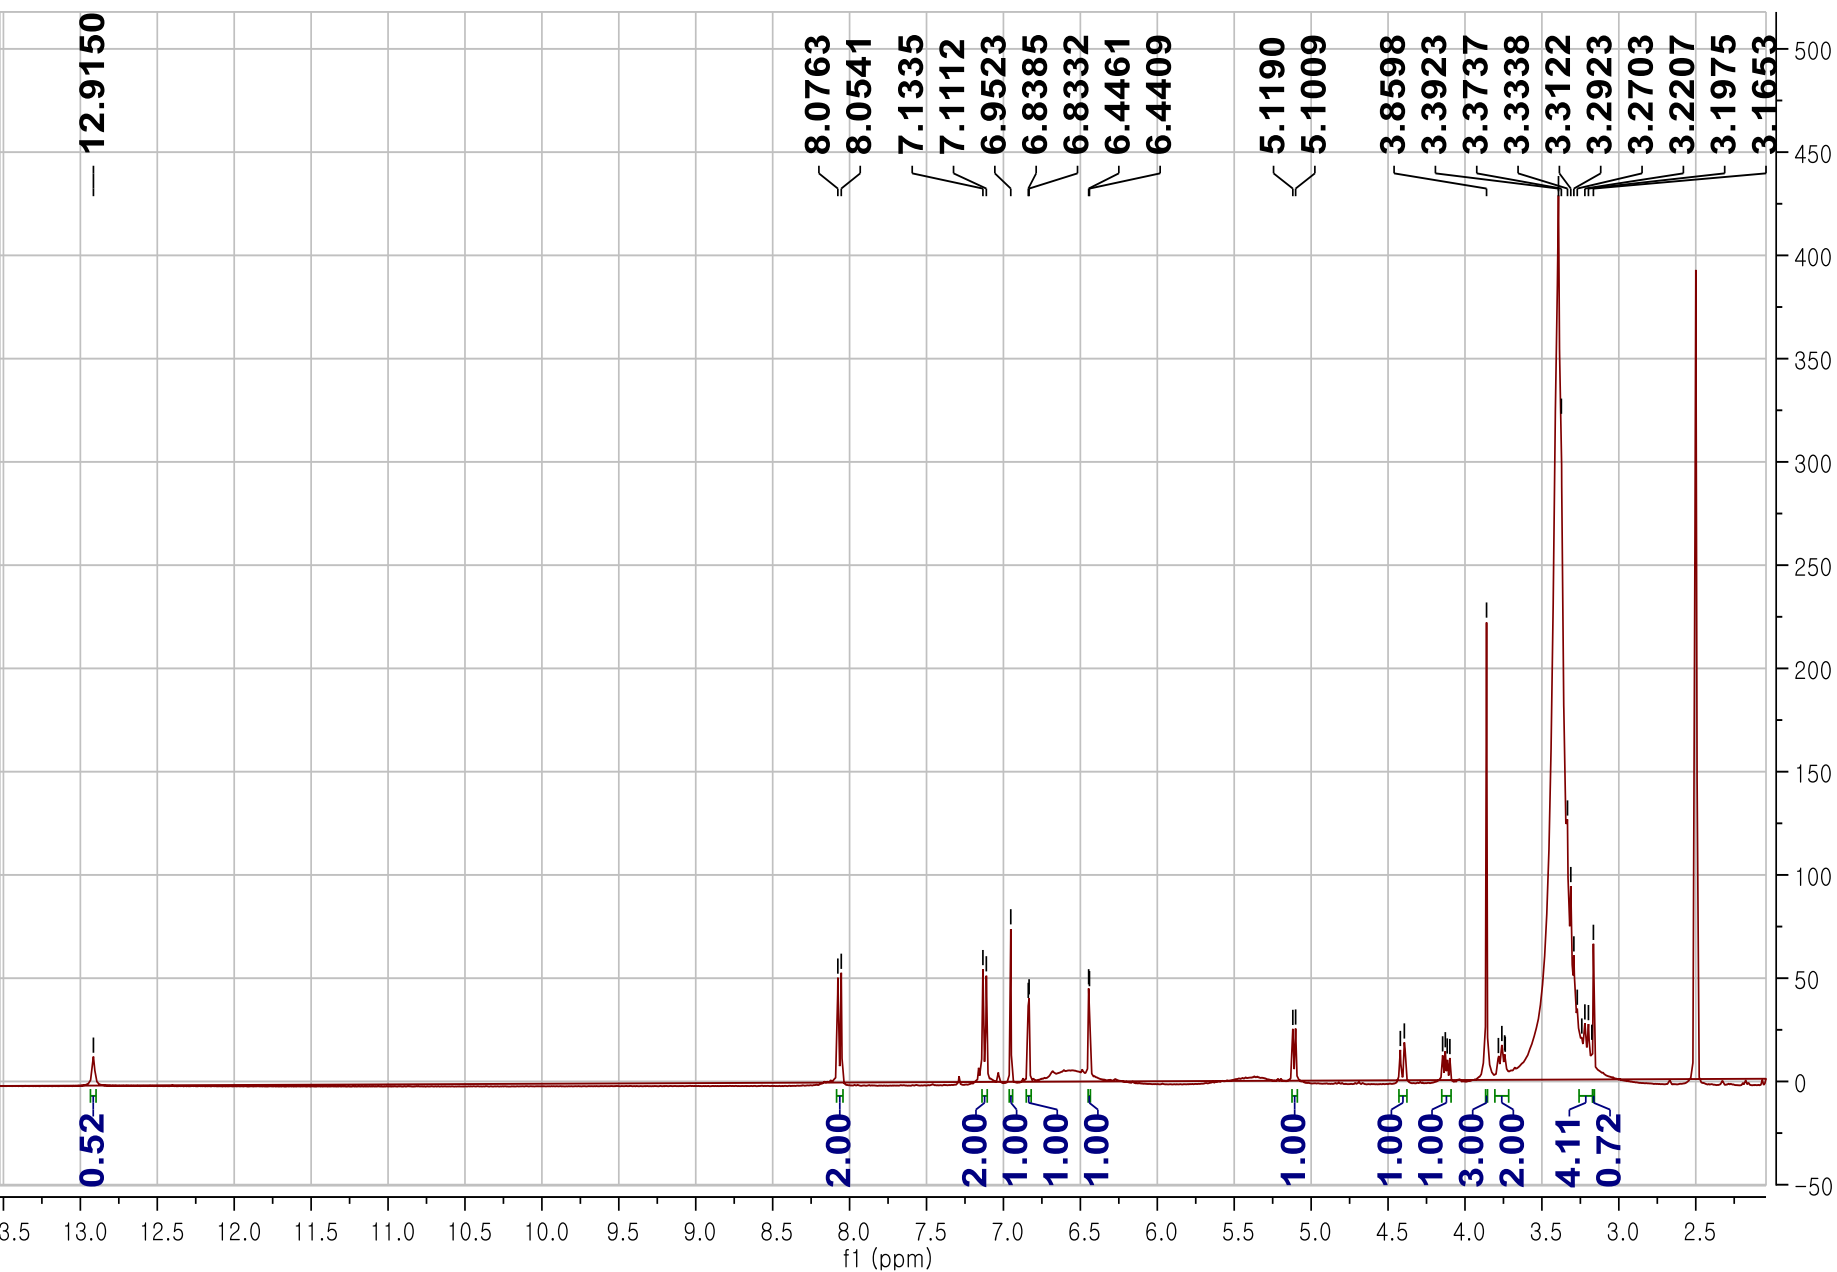

**Figure S4.** The  $^1\text{H}$  NMR spectrum of compound **4** (400 MHz,  $\text{DMSO}-d_6$ ).

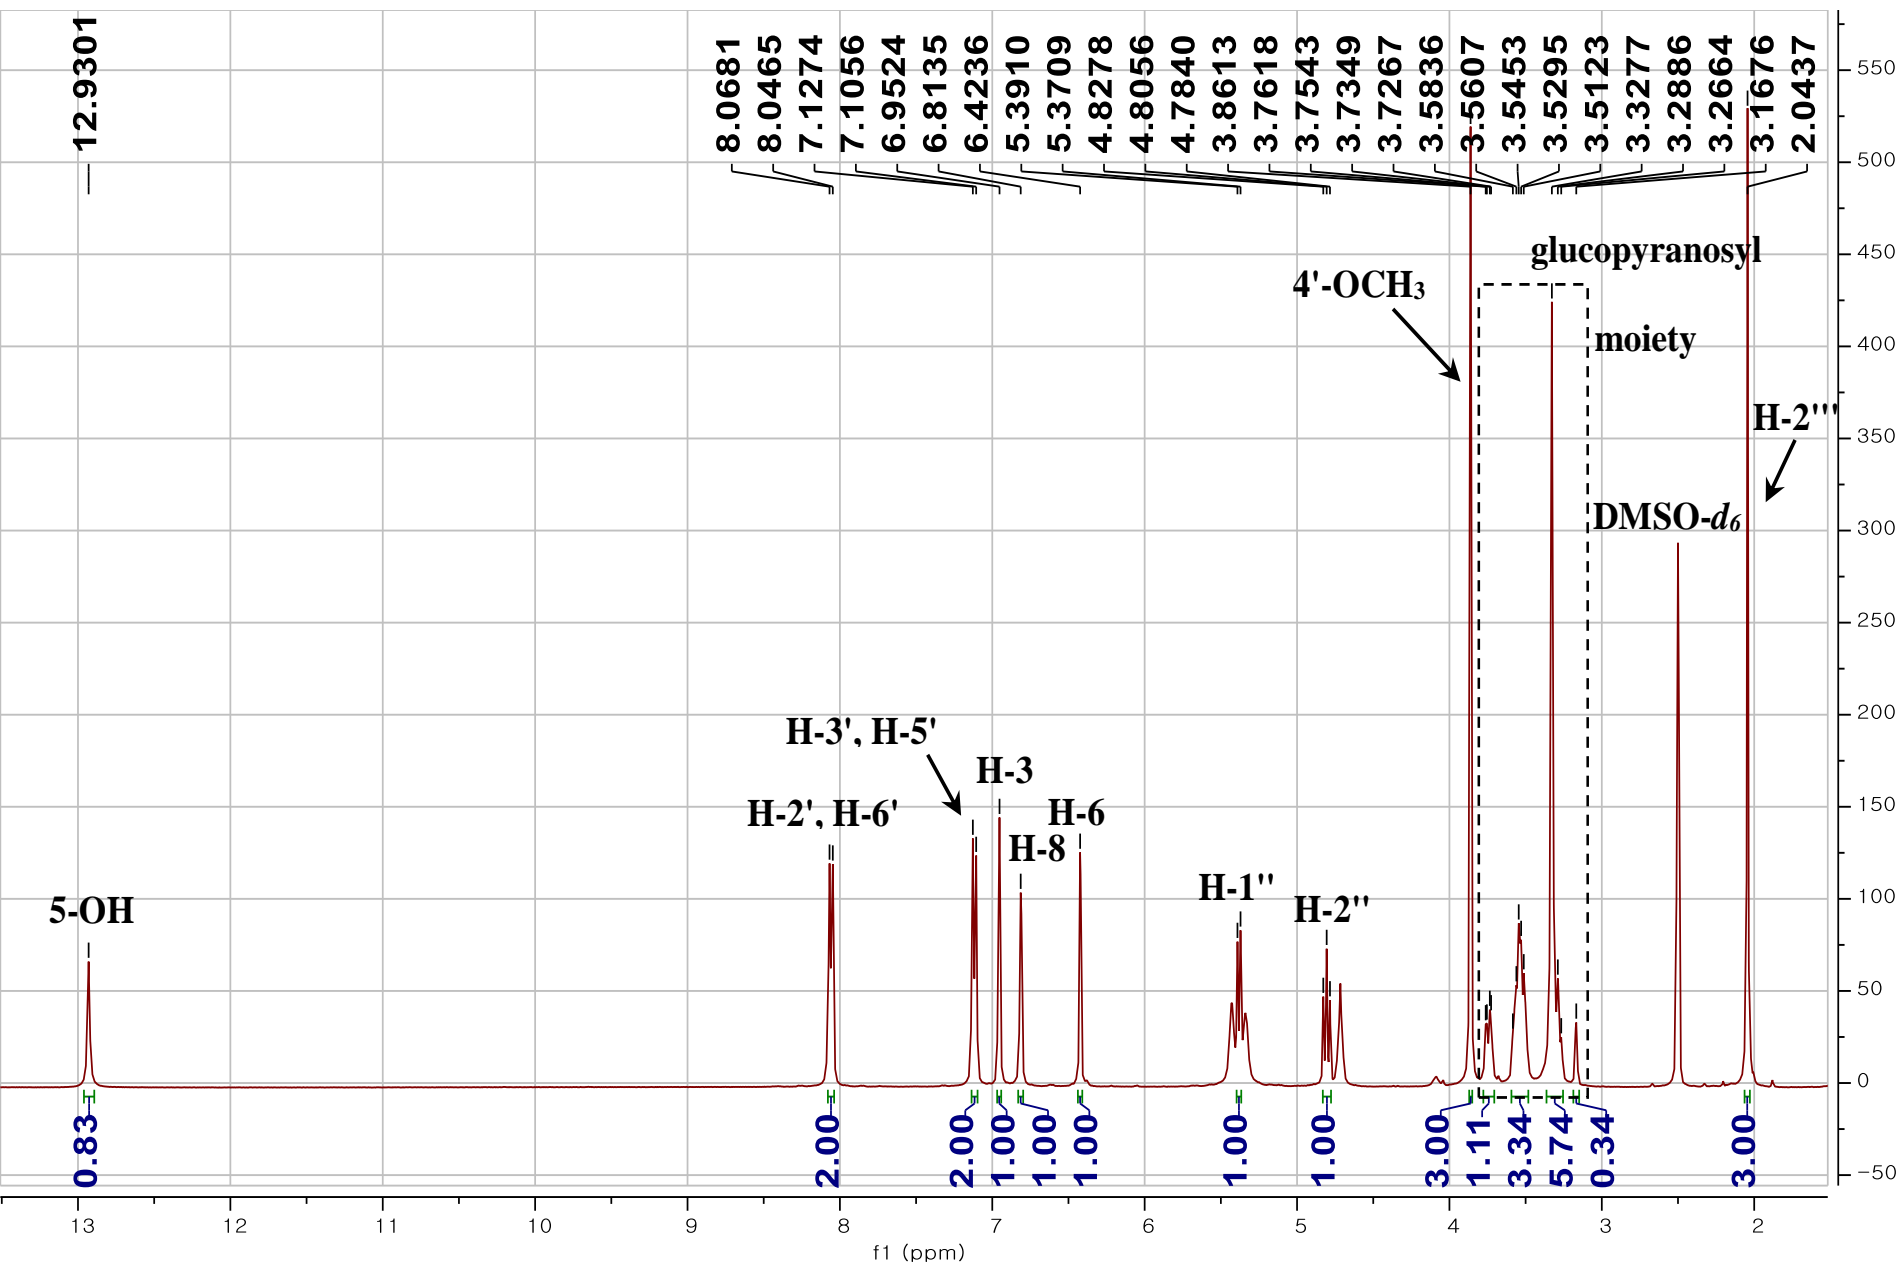

**Figure S5.** The <sup>1</sup>H NMR spectrum of compound **5** (400 MHz, DMSO-*d*<sub>6</sub>).

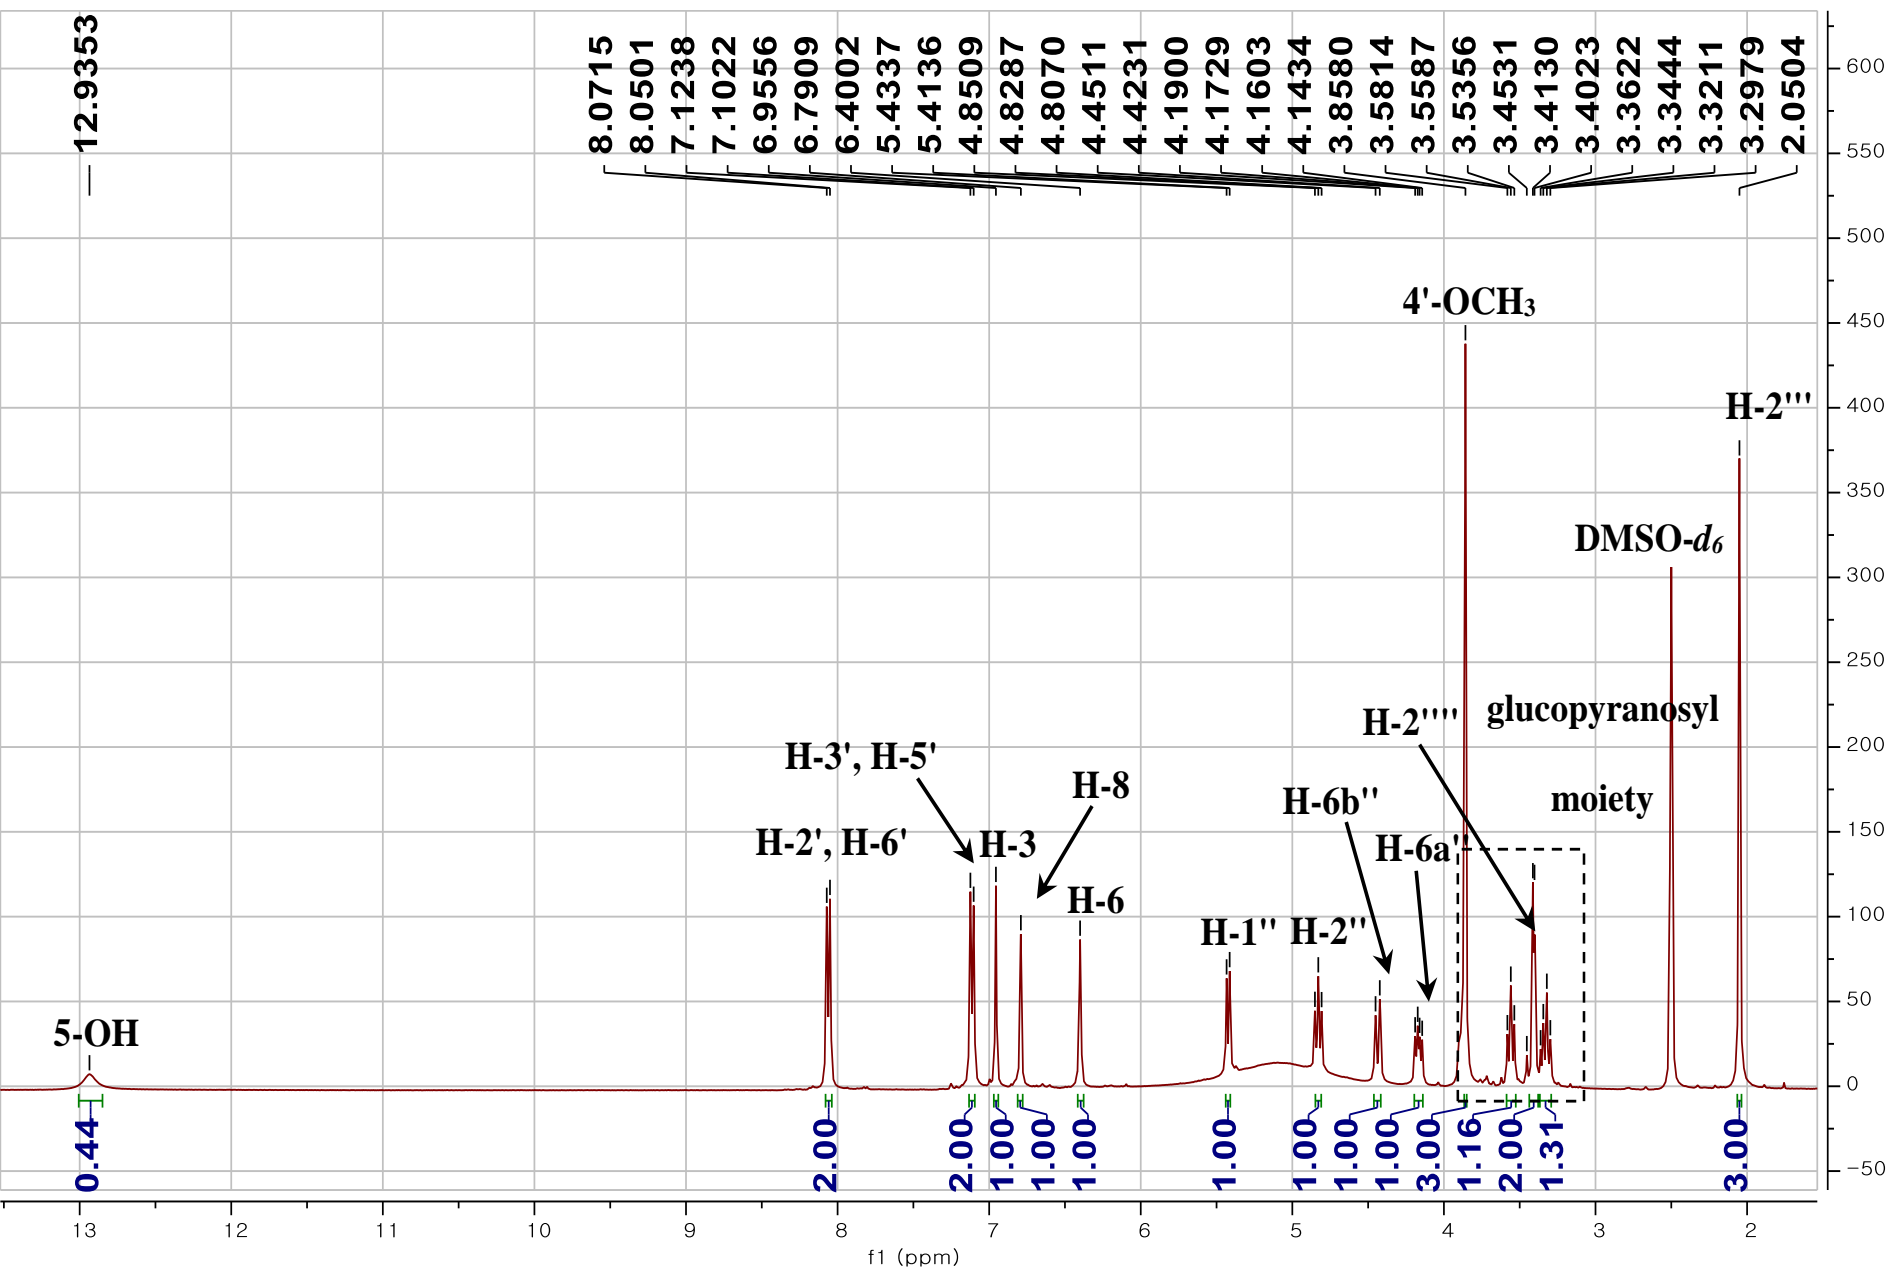

**Figure S6.** The <sup>1</sup>H NMR spectrum of compound **6** (400 MHz, DMSO-*d*<sub>6</sub>).

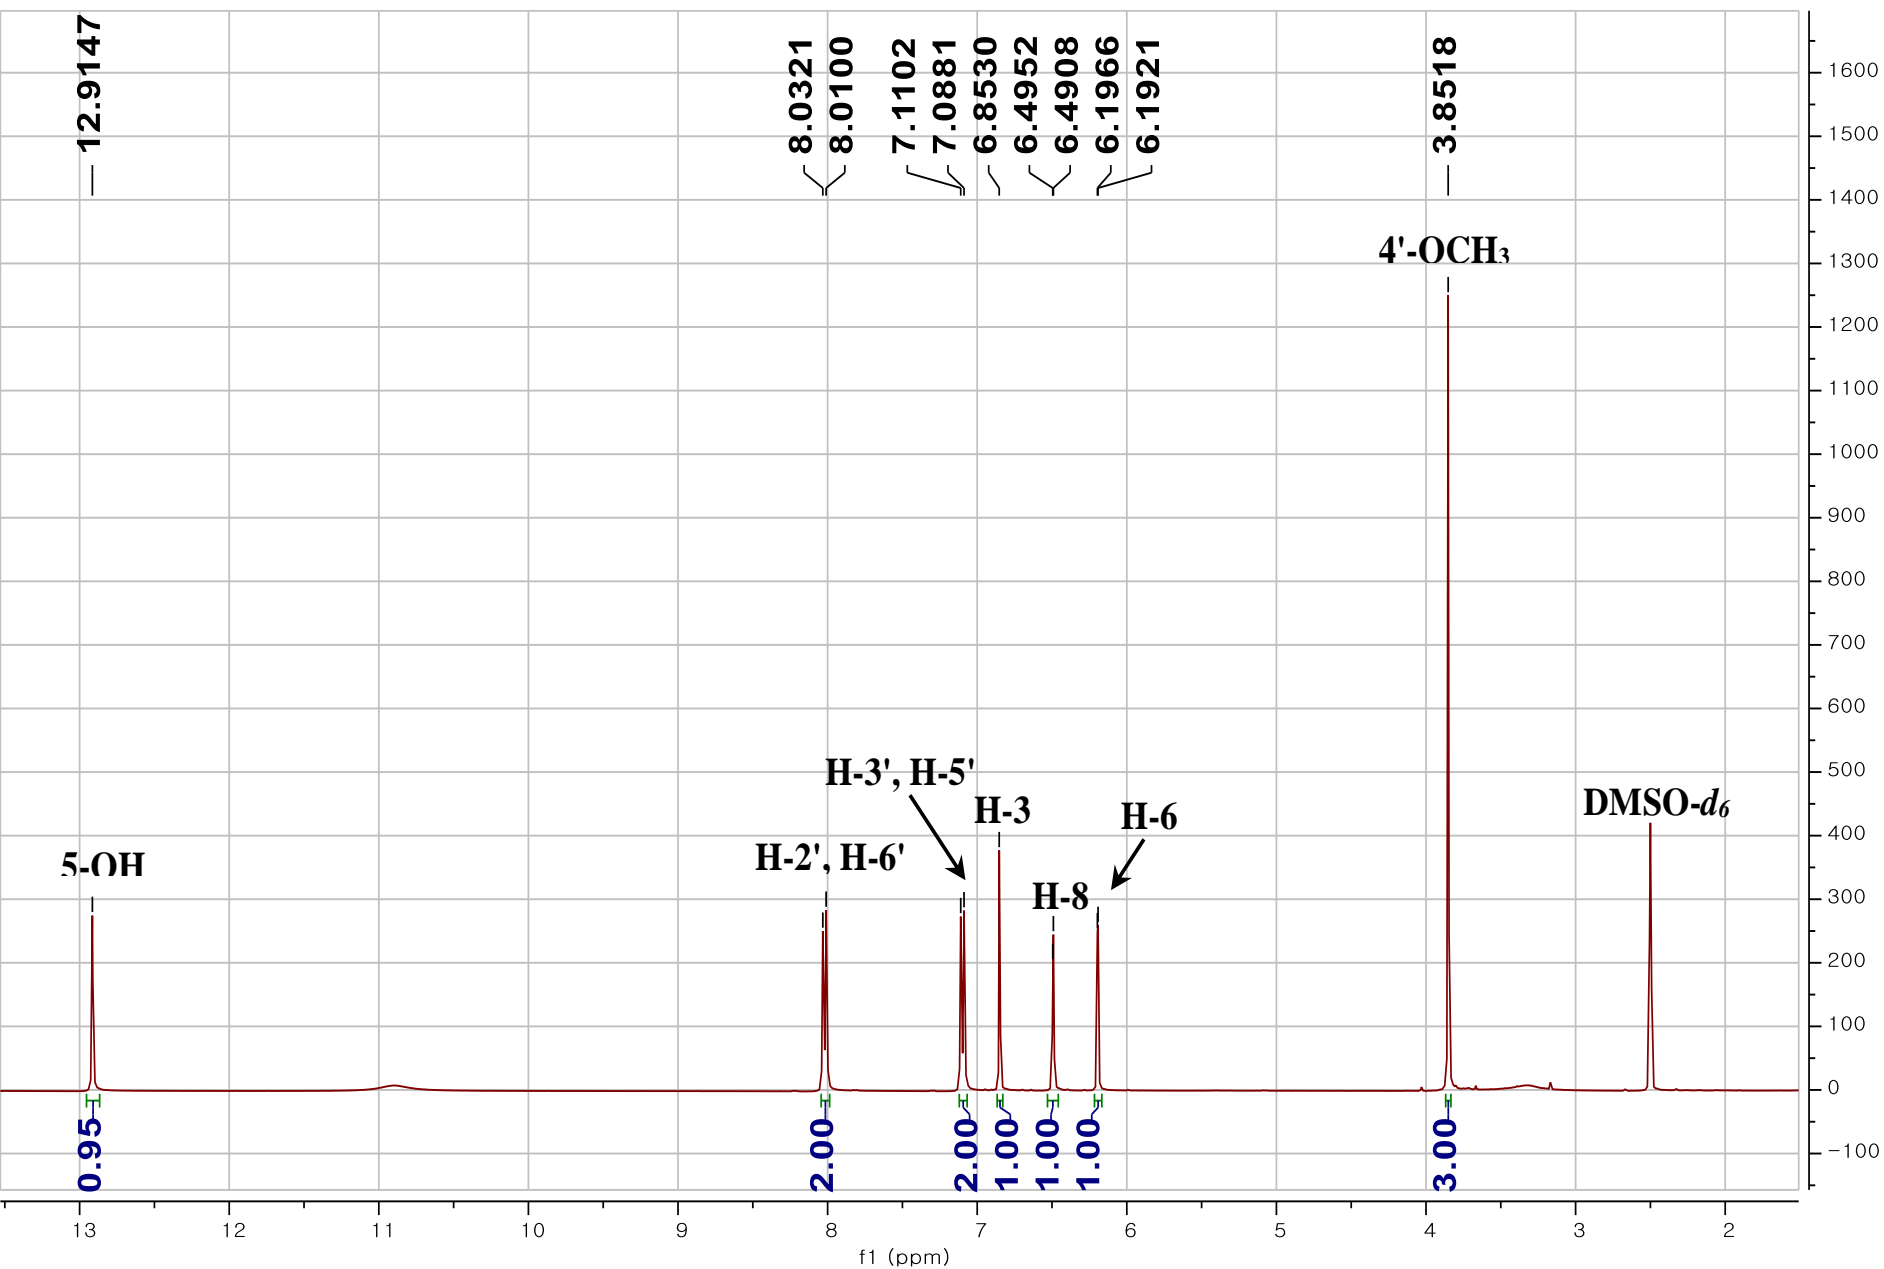

**Figure S7.** The  $^1\text{H}$  NMR spectrum of compound **7** (400 MHz,  $\text{DMSO-}d_6$ ).



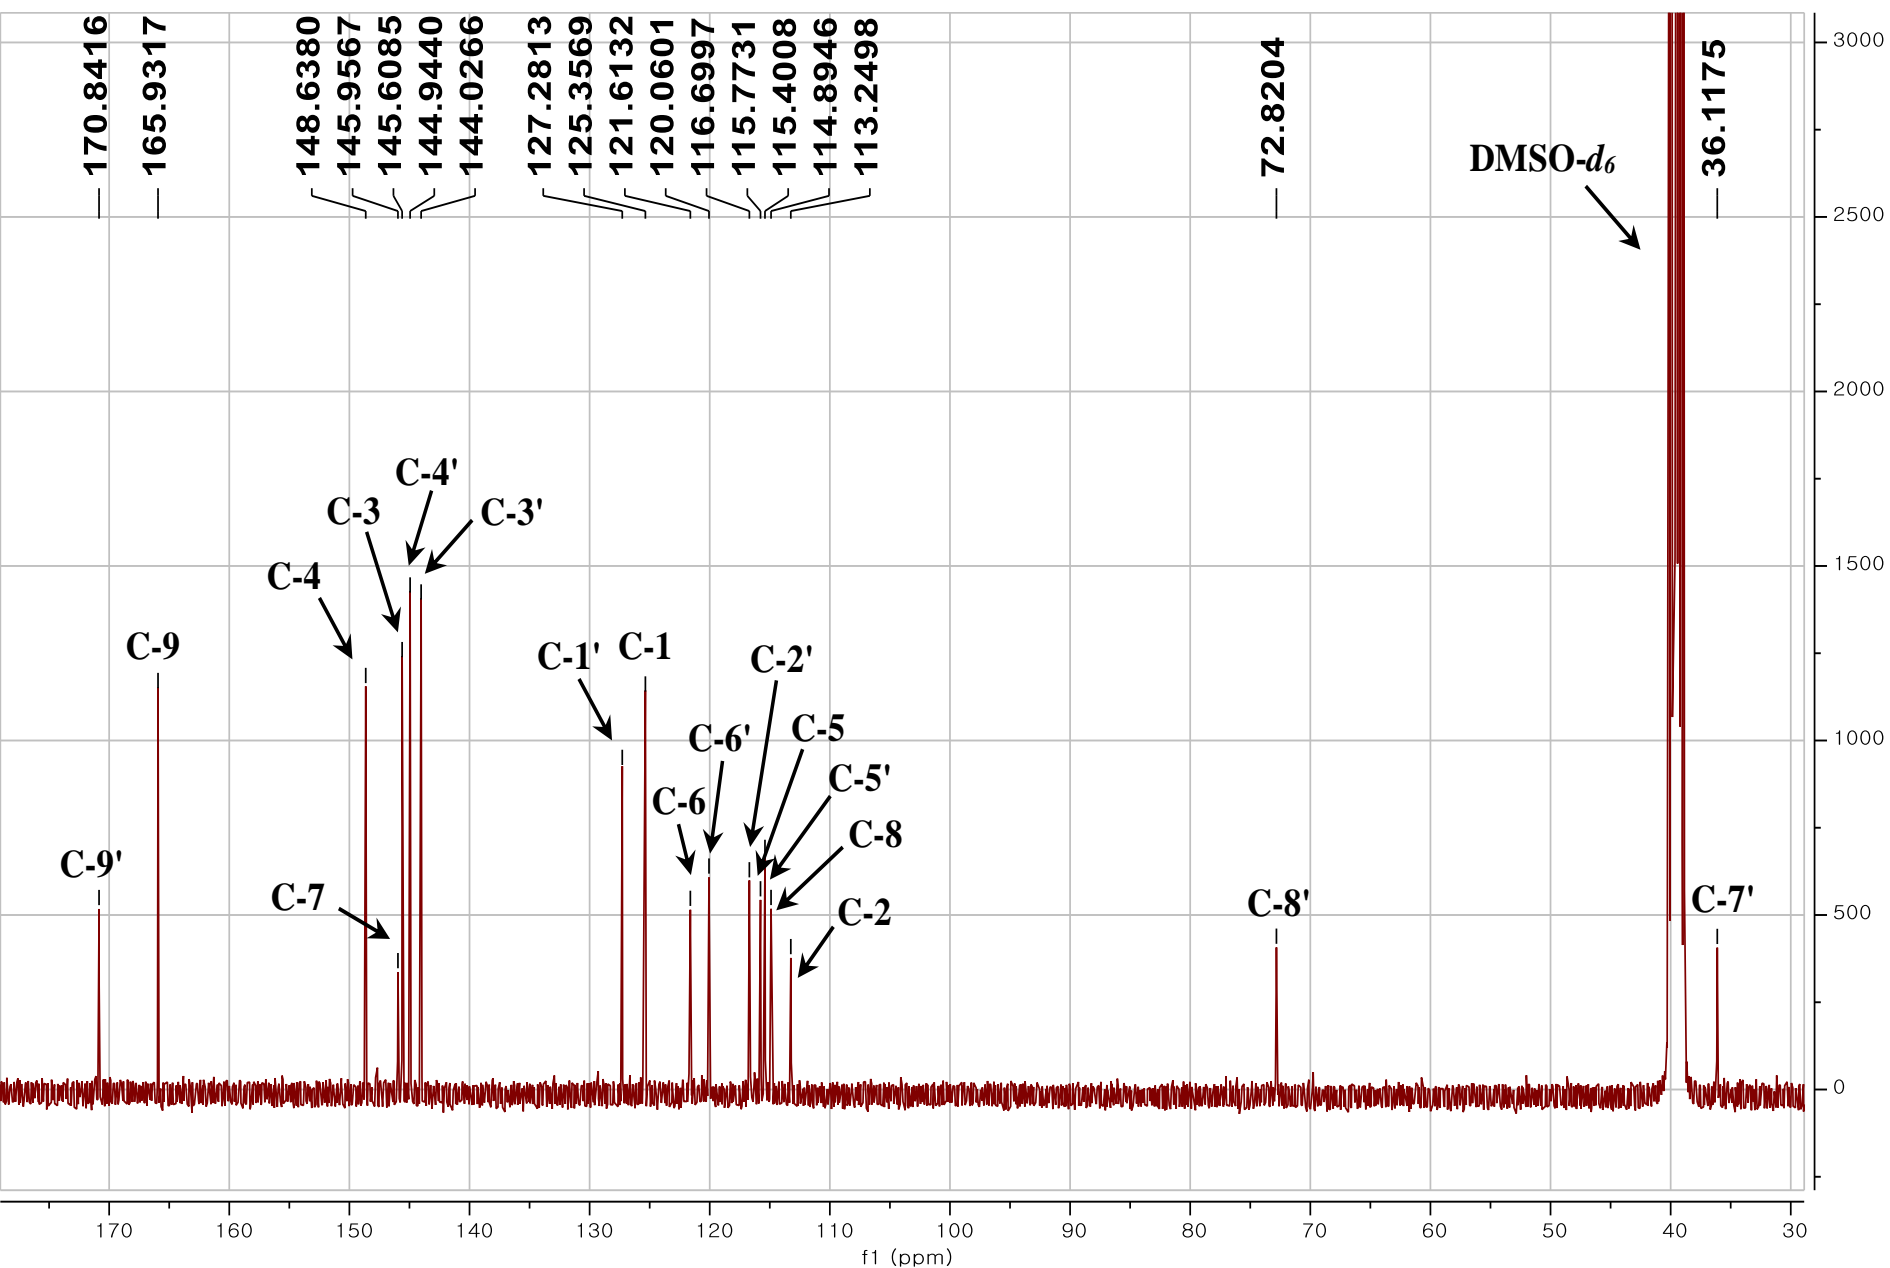

**Figure S8.** The  $^{13}\text{C}$  NMR spectrum of compound **1** (100 MHz, DMSO- $d_6$ ).

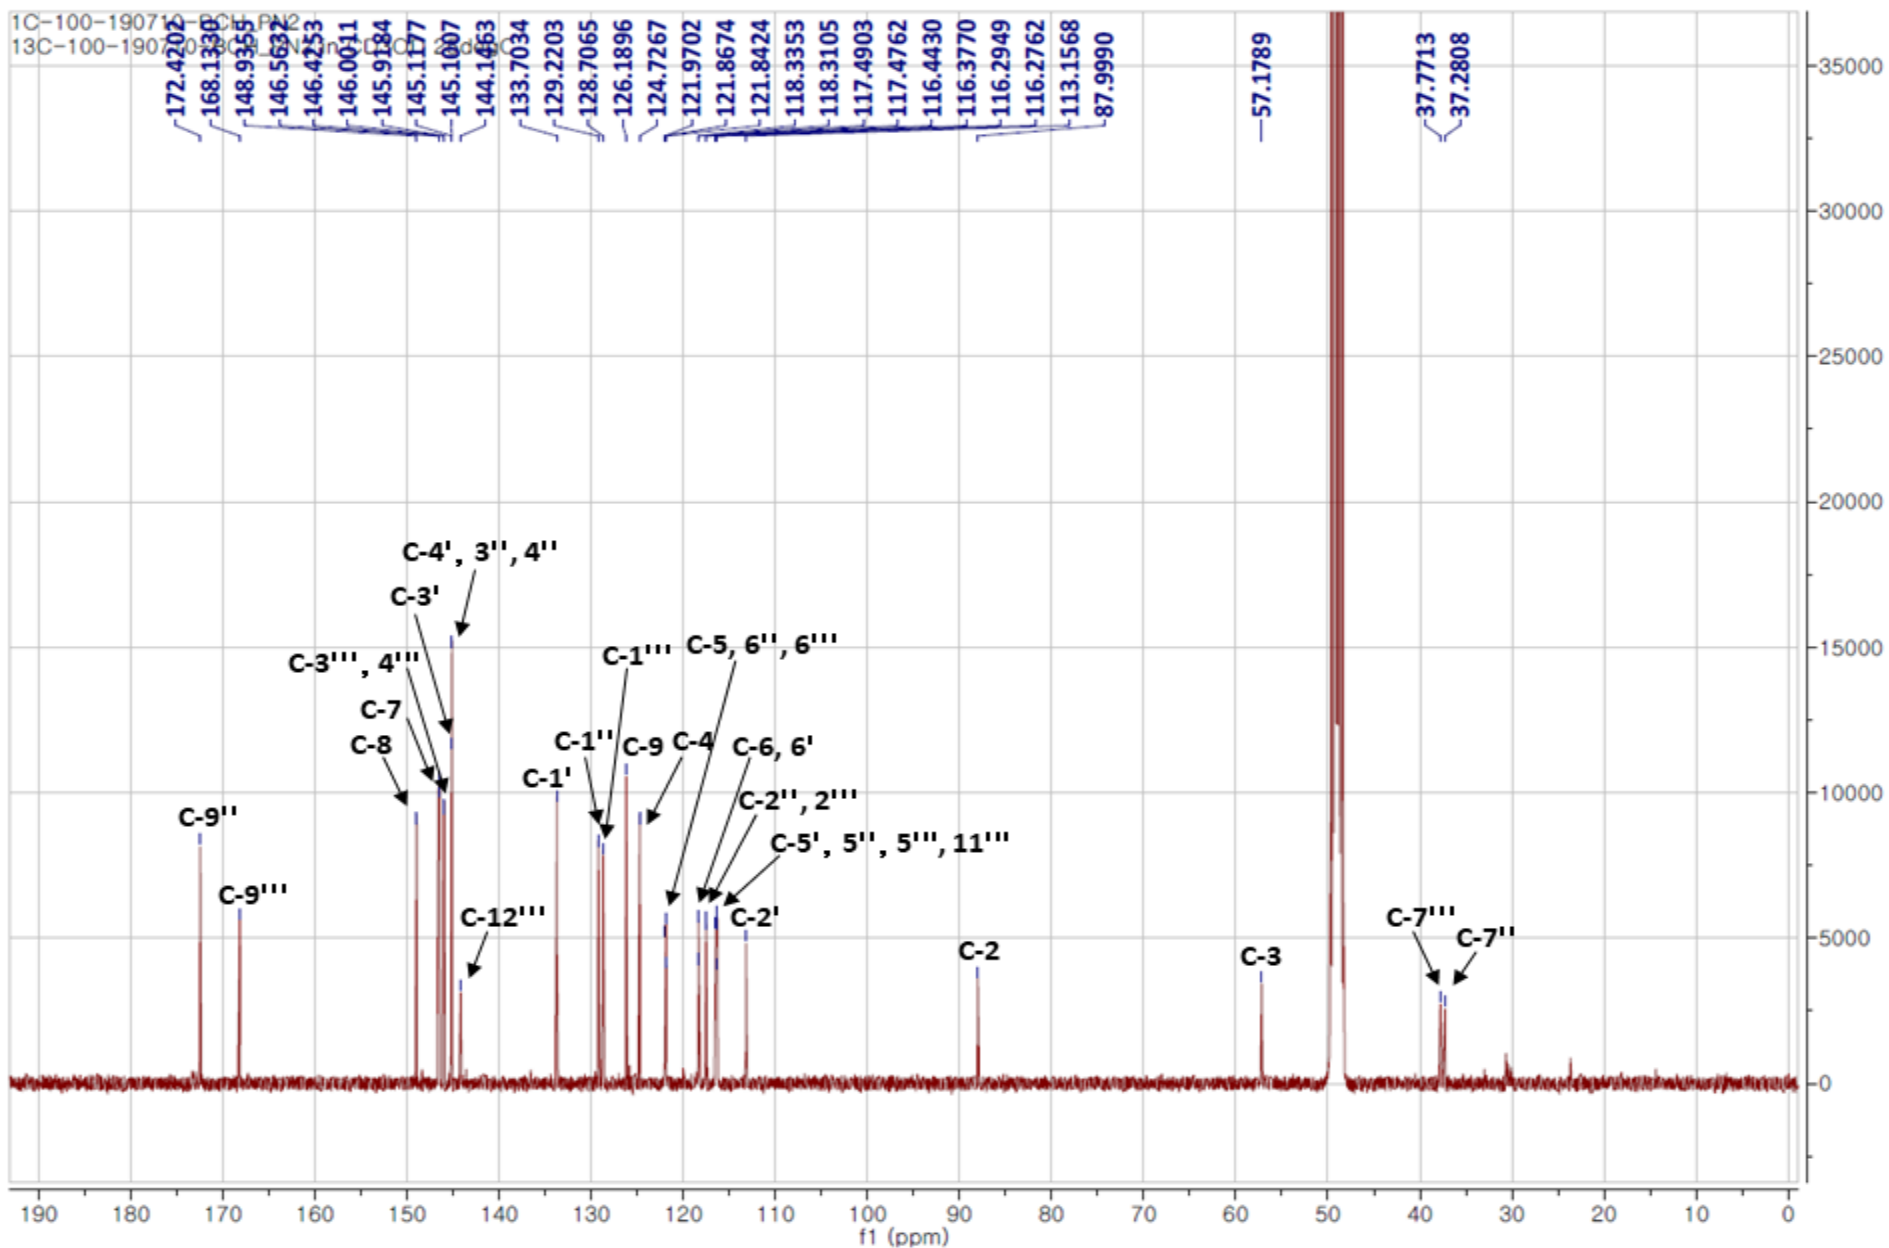

**Figure S9.** The  $^{13}\text{C}$  NMR spectrum of compound **2** (125 MHz,  $\text{CD}_3\text{OD}$ ).

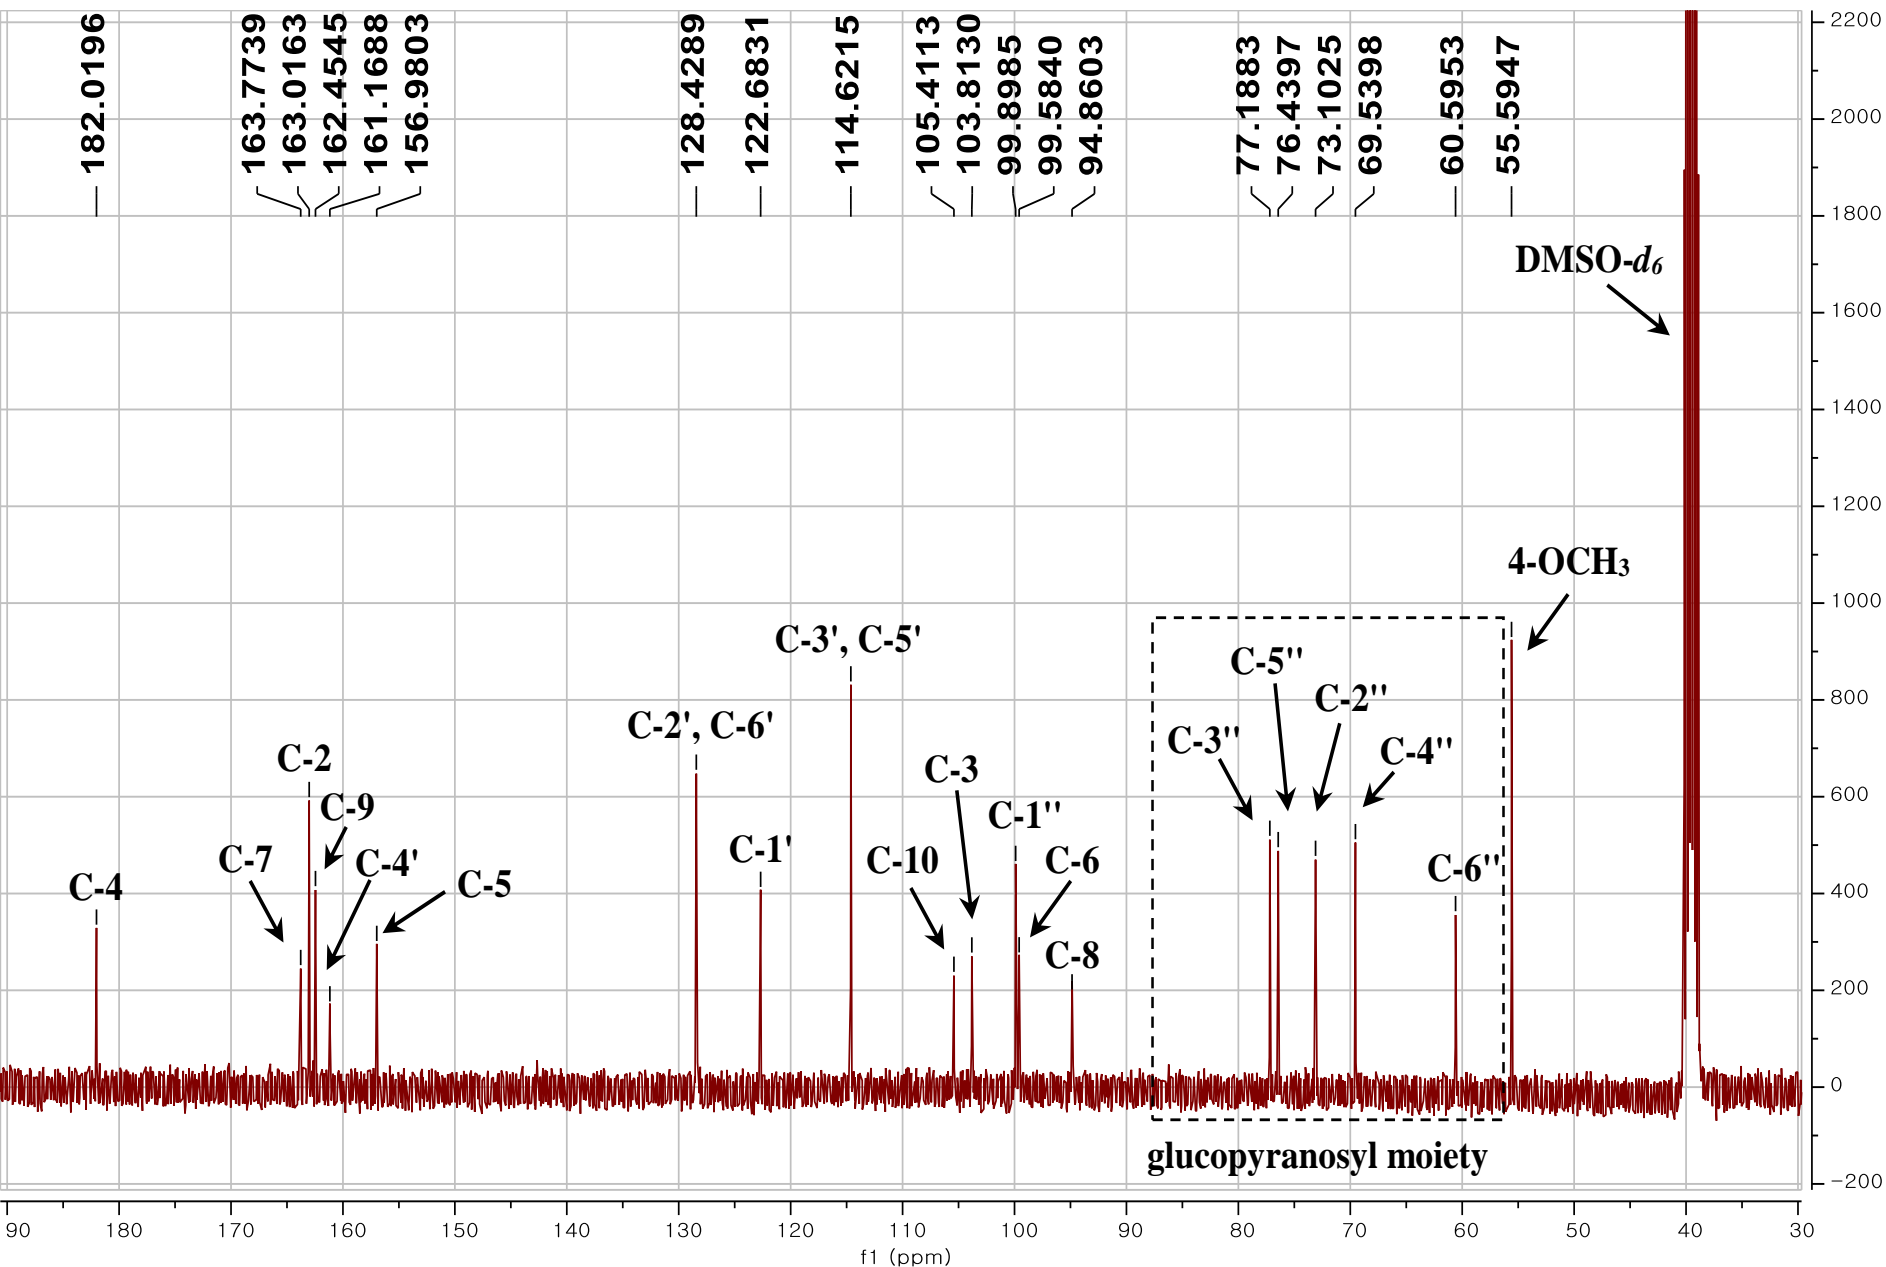

**Figure S10.** The <sup>13</sup>C NMR spectrum of compound **3** (100 MHz, DMSO-*d*<sub>6</sub>).

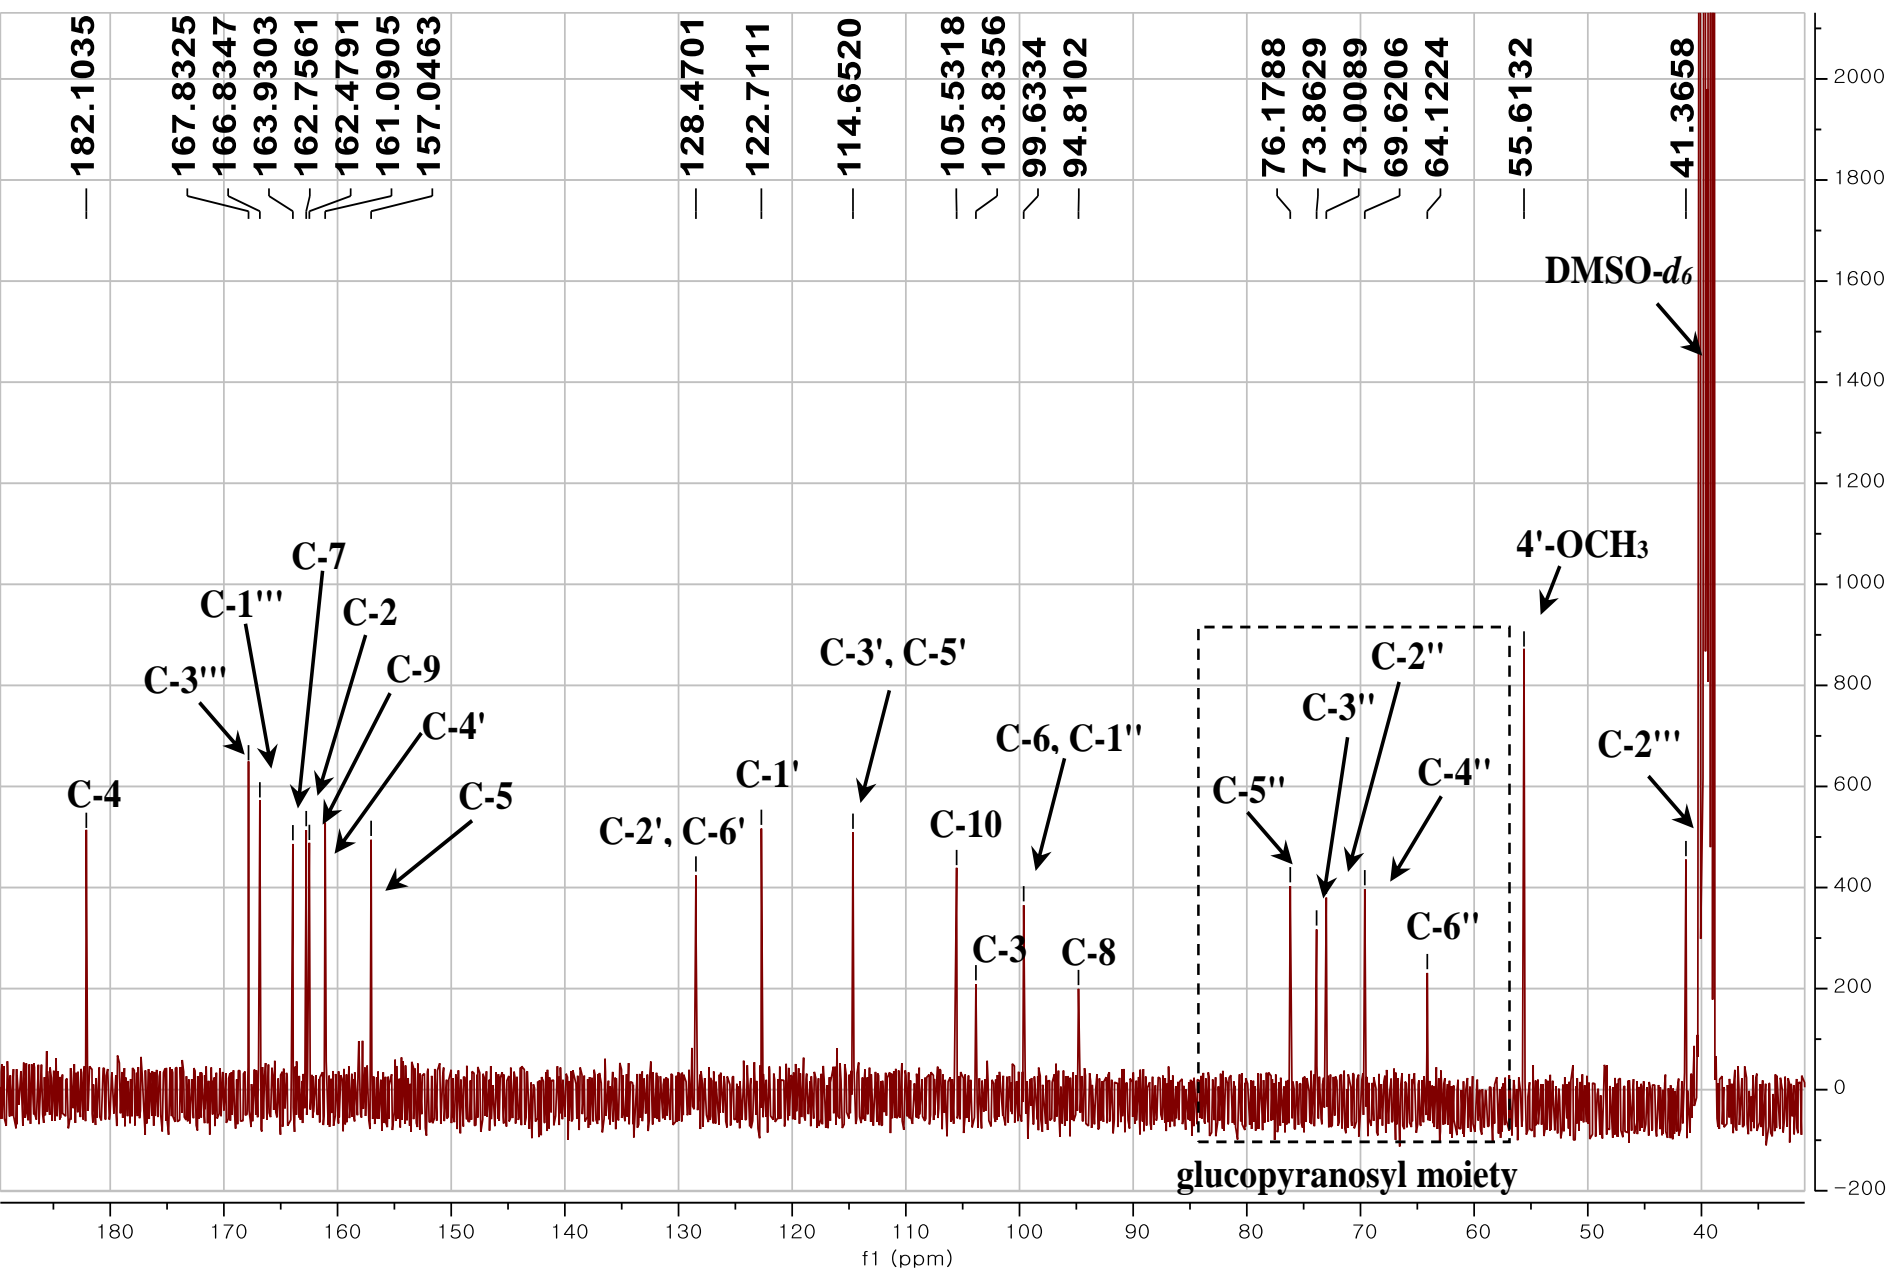

**Figure S11.** The  $^{13}\text{C}$  NMR spectrum of compound **4** (100 MHz,  $\text{DMSO-}d_6$ ).

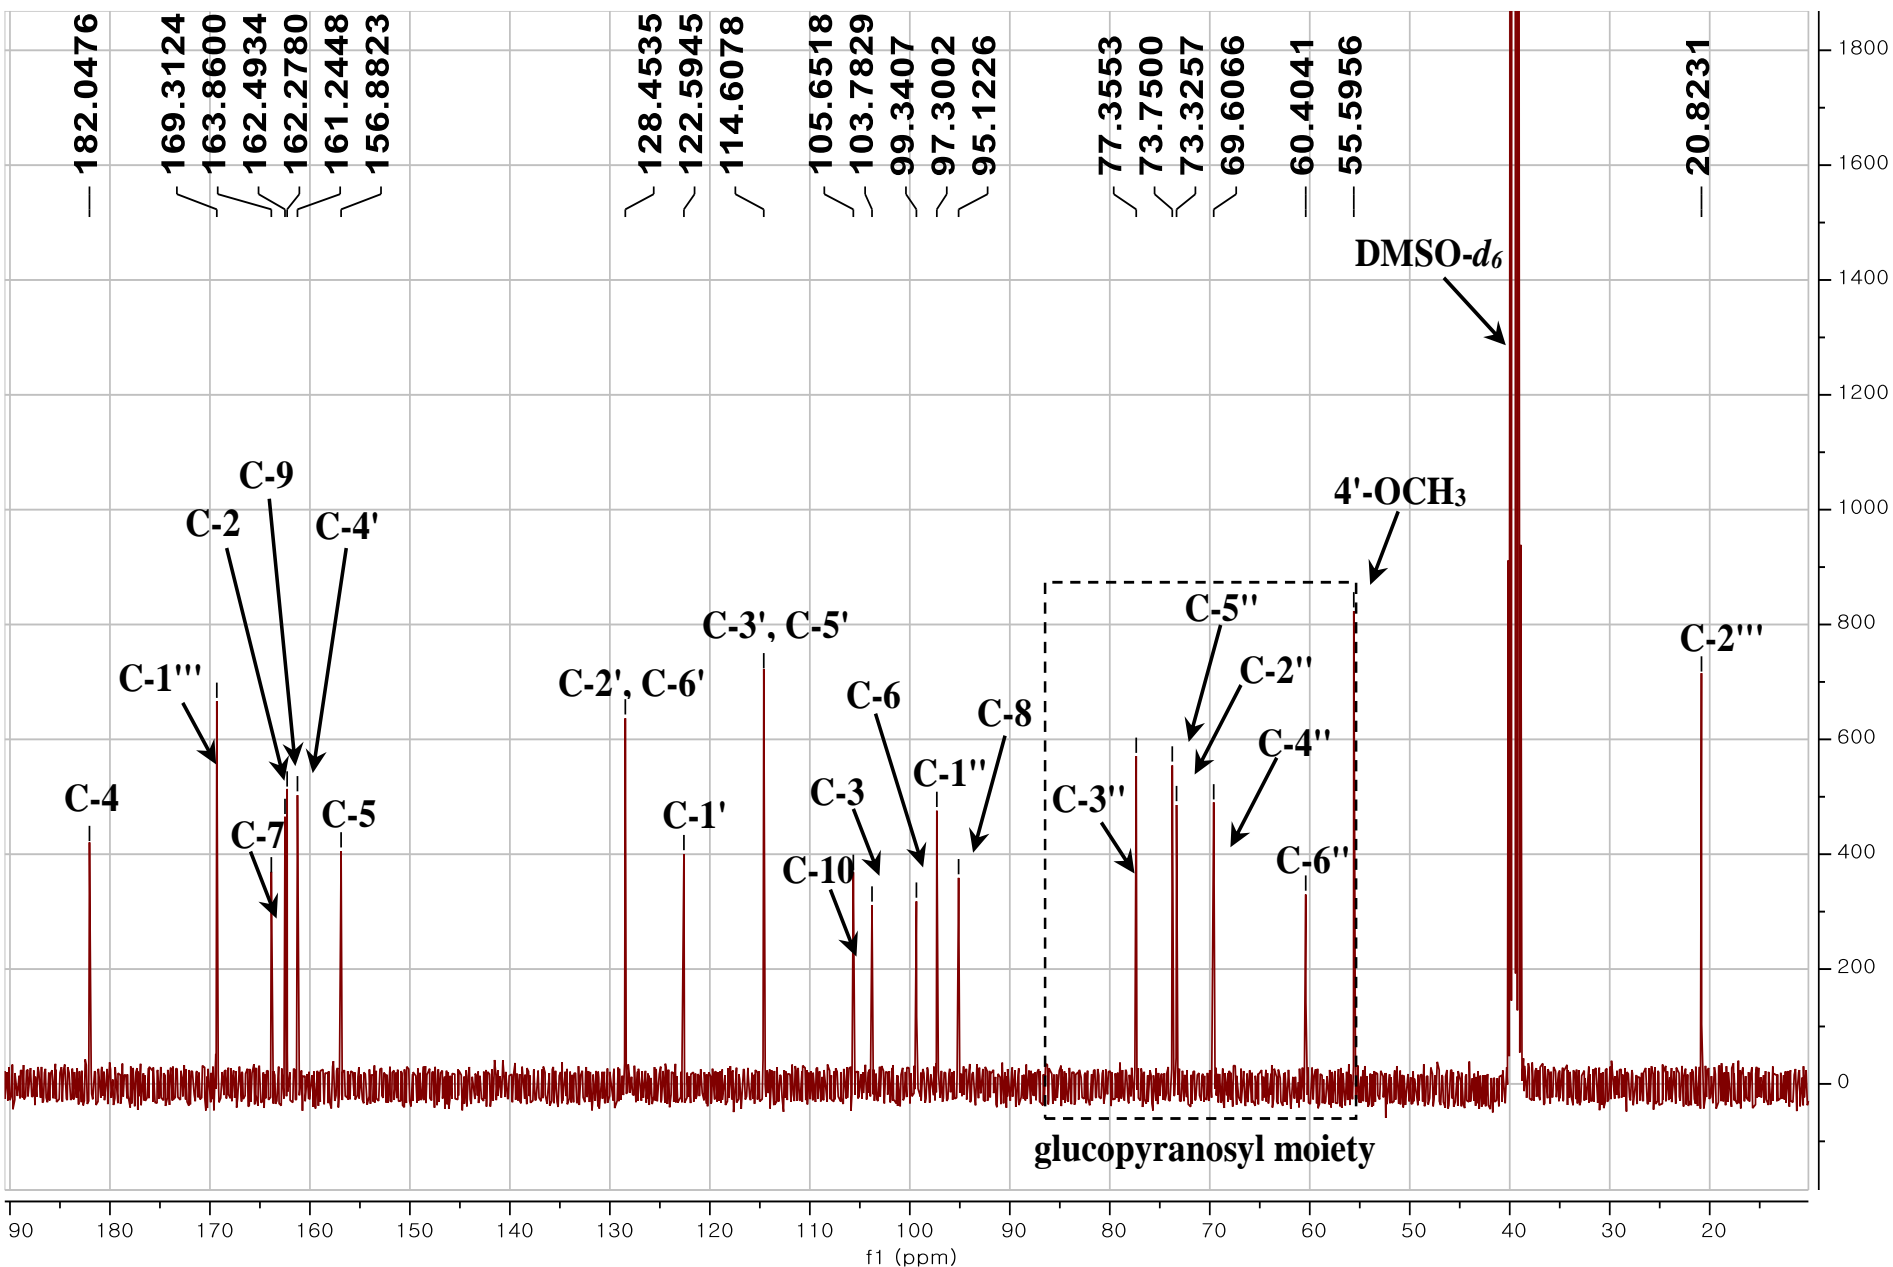

**Figure S12.** The  $^{13}\text{C}$  NMR spectrum of compound **5** (100 MHz,  $\text{DMSO-}d_6$ ).

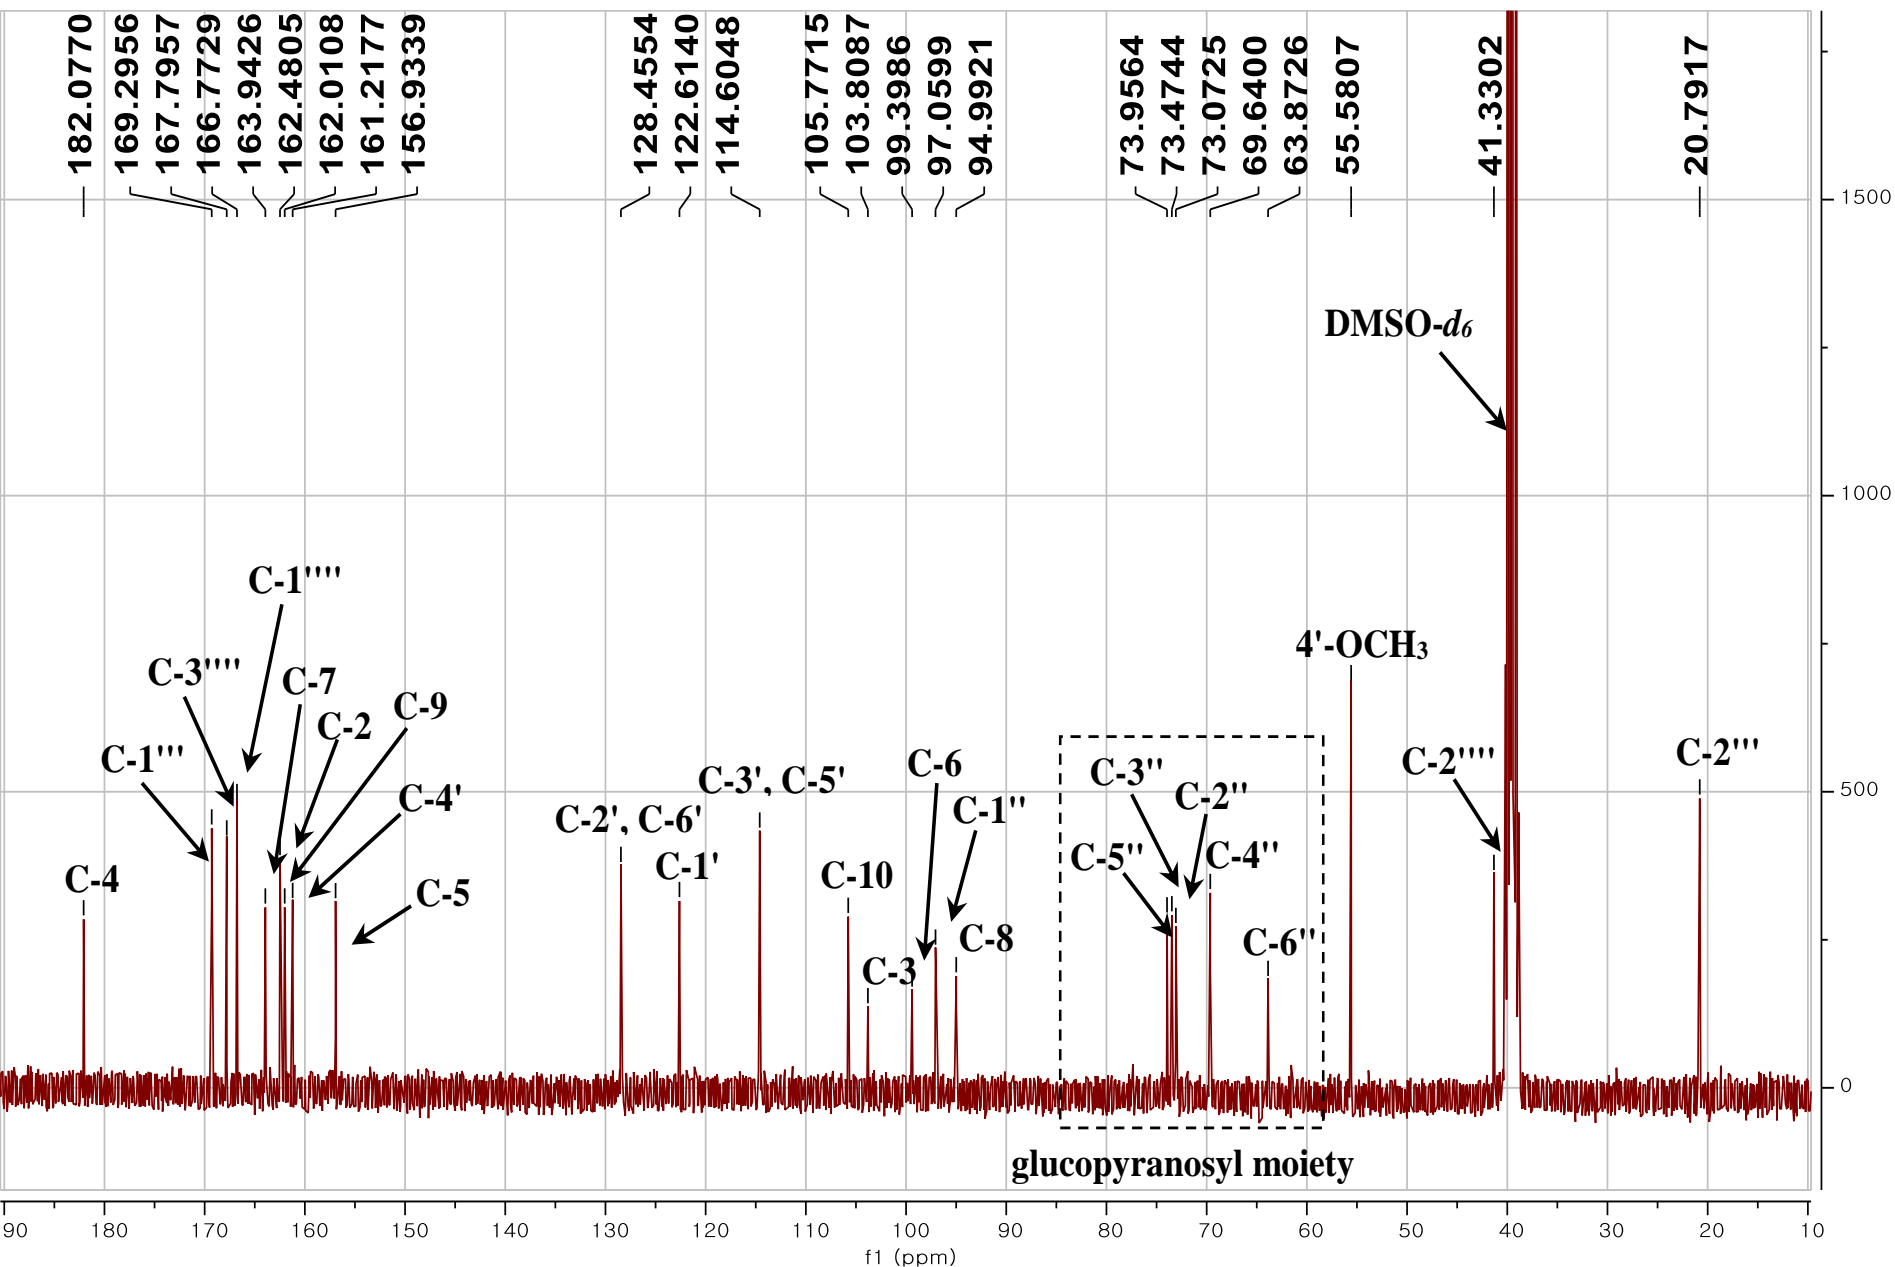

**Figure S13.** The  $^{13}\text{C}$  NMR spectrum of compound **6** (100 MHz,  $\text{DMSO-}d_6$ ).

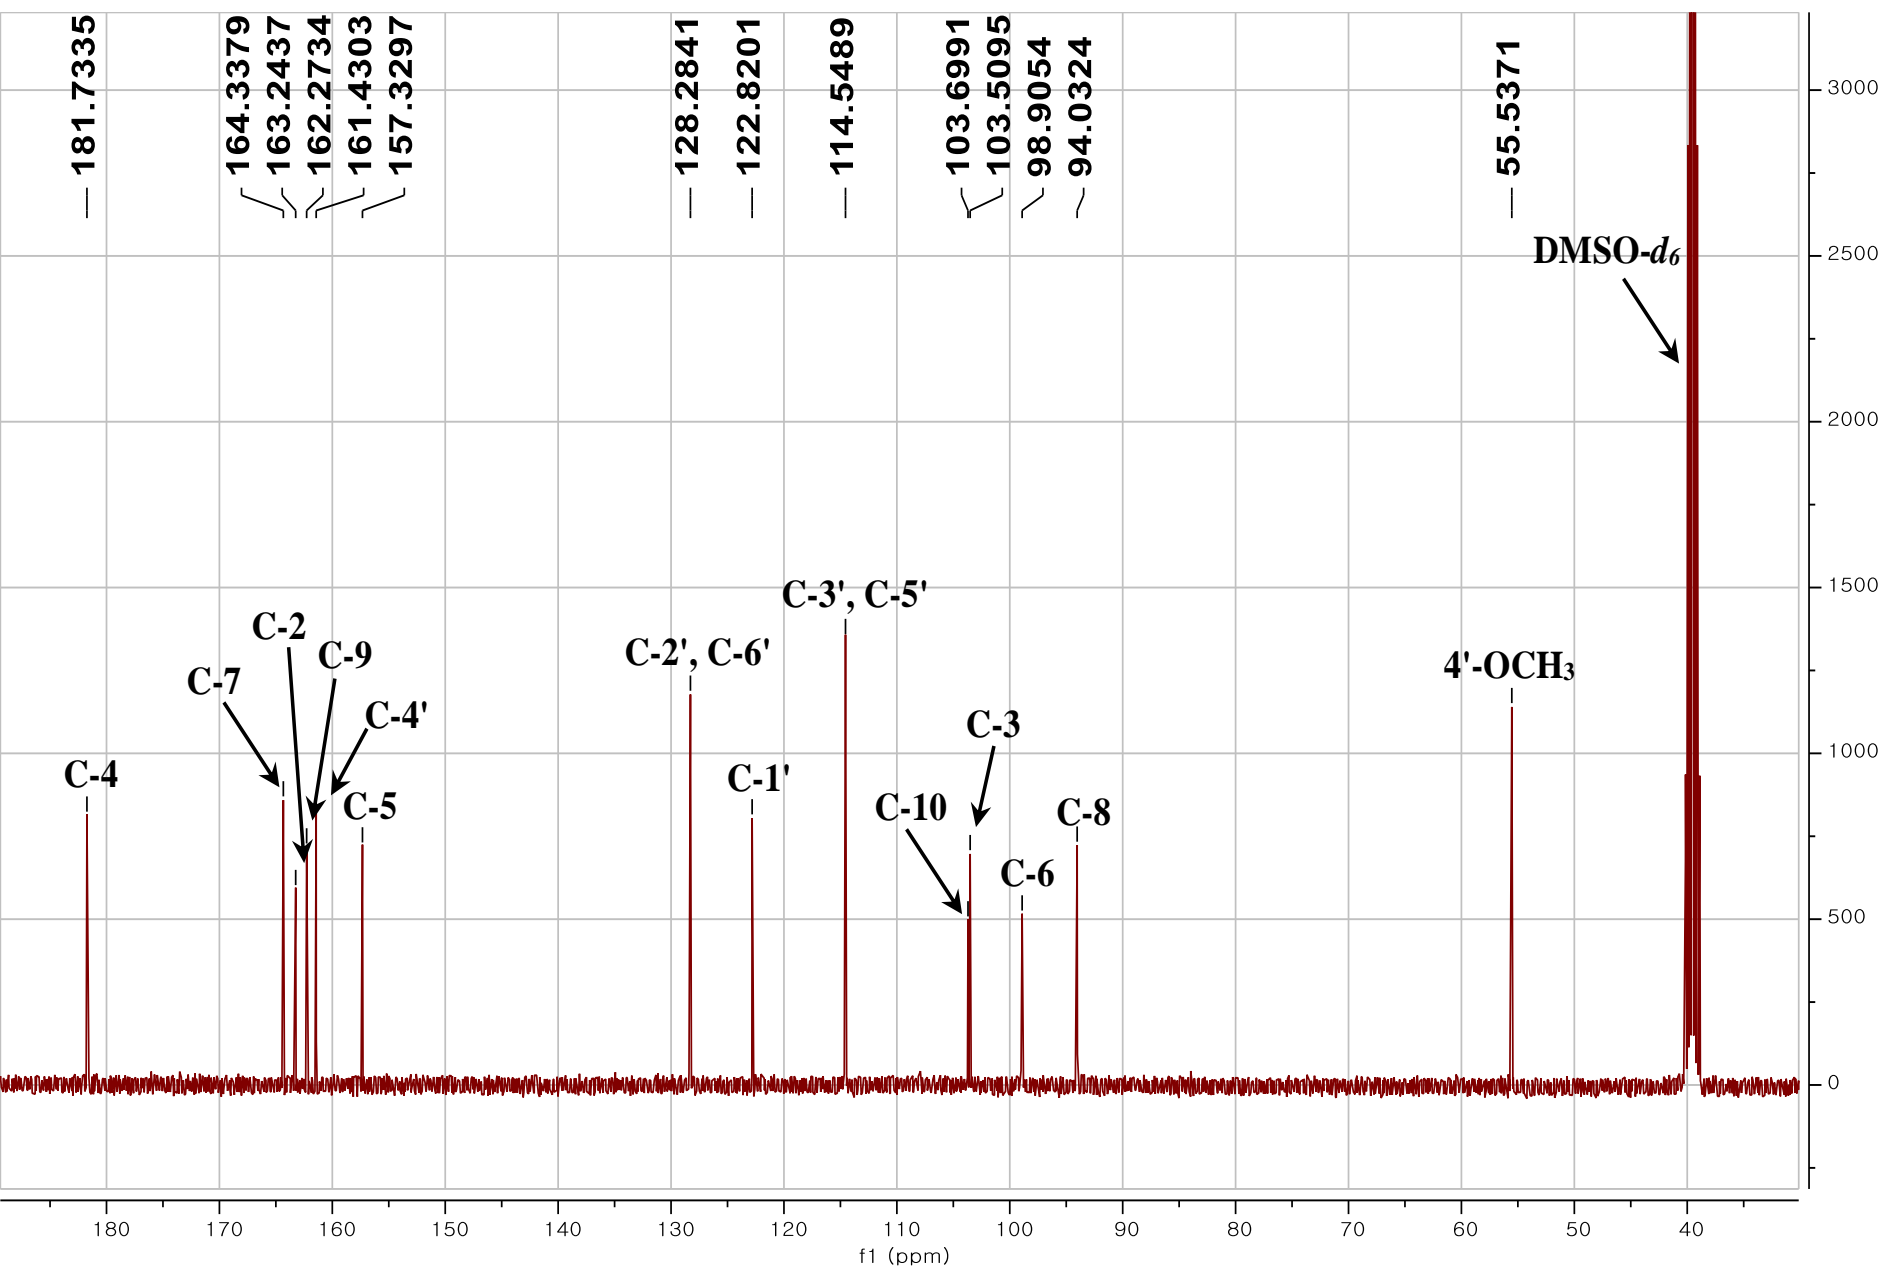

**Figure S14.** The  $^{13}\text{C}$  NMR spectrum of compound **7** (100 MHz, DMSO- $d_6$ ).

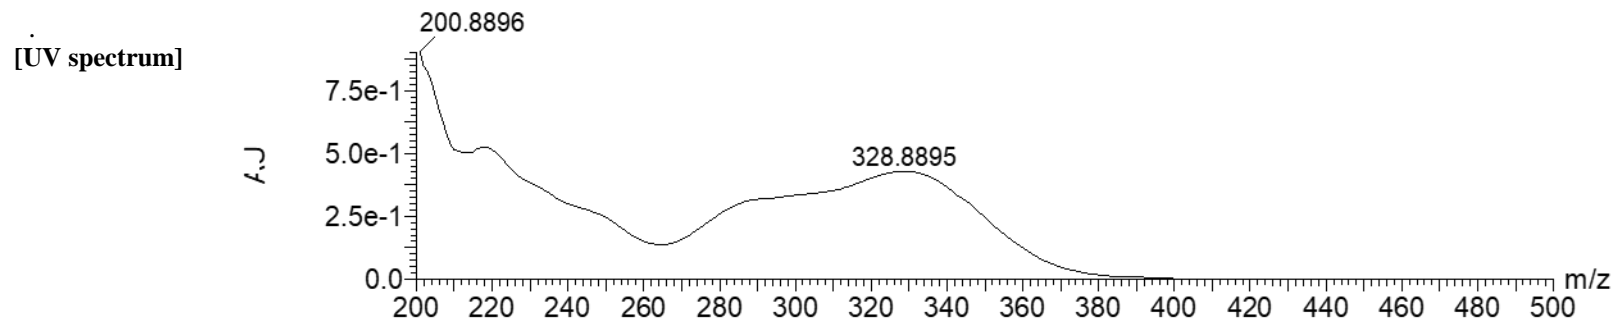

[MS Chromatogram]  
negative

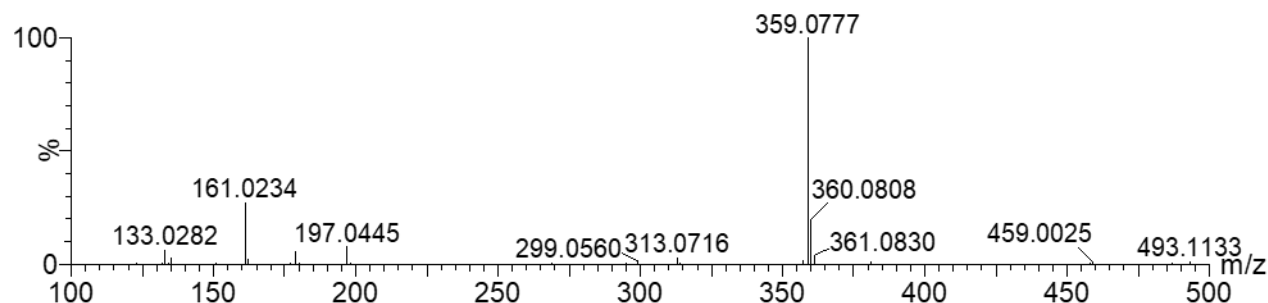

[MS/MS Chromatogram]  
negative

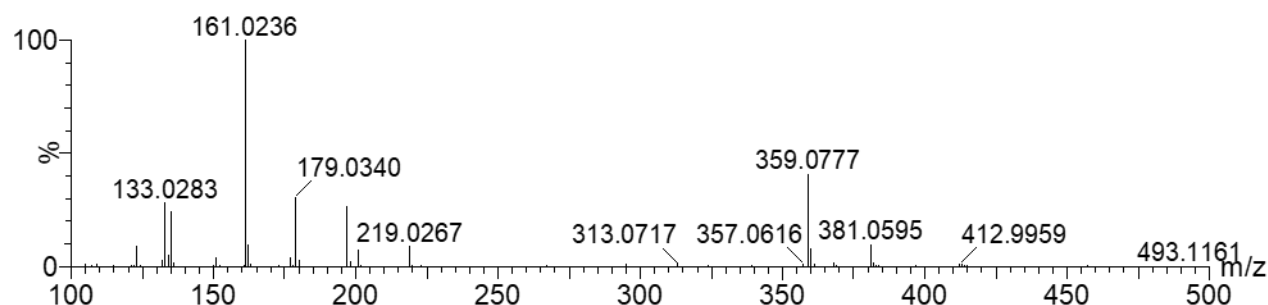

Elemental Composition:  
[HR-ESI/MS] negative

#### Single Mass Analysis

Tolerance = 5.0 PPM / DBE: min = -1.5, max = 50.0

Element prediction: Off

Number of isotope peaks used for i-FIT = 3

Monoisotopic Mass, Even Electron Ions

76 formula(e) evaluated with 1 results within limits (up to 50 closest results for each mass)

Elements Used:

| Mass     | Calc. Mass | mDa | PPM | DBE  | Formula                                        | i-FIT | i-FIT Norm | Fit Conf % | C  | H  | O |
|----------|------------|-----|-----|------|------------------------------------------------|-------|------------|------------|----|----|---|
| 359.0777 | 359.0767   | 1.0 | 2.8 | 11.5 | C <sub>18</sub> H <sub>15</sub> O <sub>8</sub> | 844.2 | n/a        | n/a        | 18 | 15 | 8 |

**Figure S15.** Identification of compound **1** by UPLC-QToF MS.



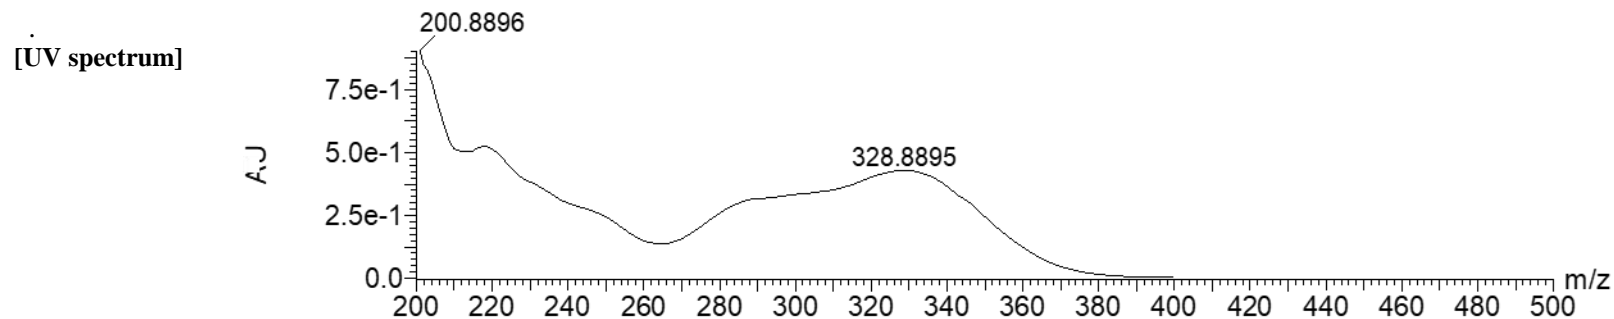

[MS Chromatogram]  
negative

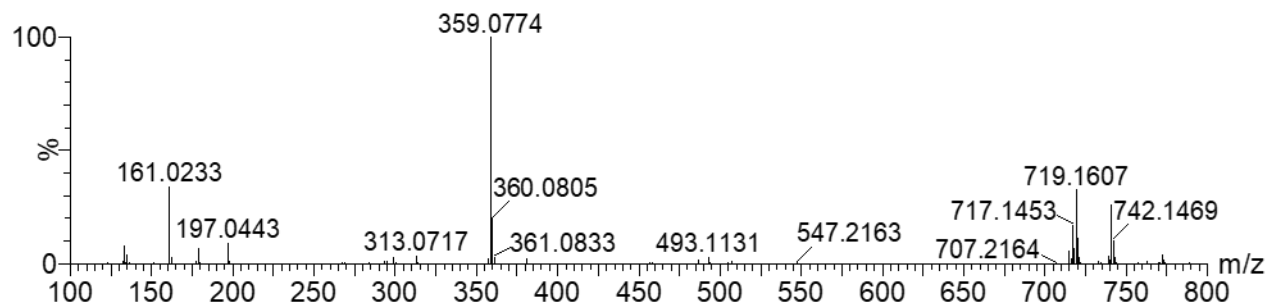

[MS/MS Chromatogram]  
negative

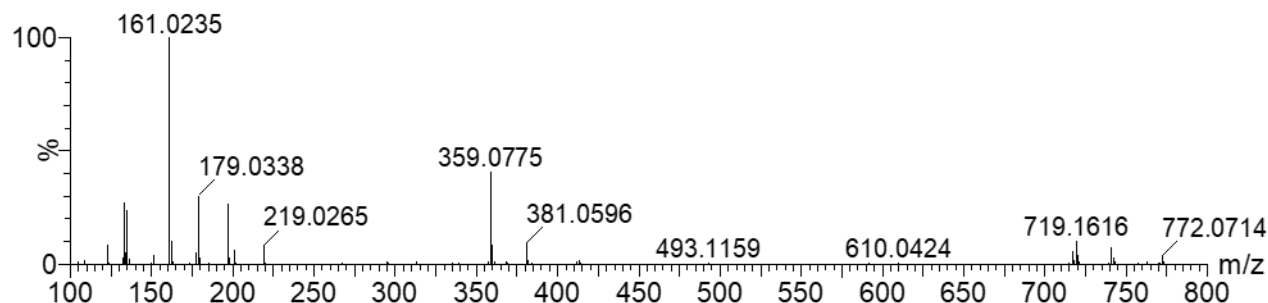

Elemental Composition:  
[HR-ESI/MS] negative

**Single Mass Analysis**

Tolerance = 5.0 PPM / DBE: min = -1.5, max = 50.0

Element prediction: Off

Number of isotope peaks used for i-FIT = 3

Monoisotopic Mass, Even Electron Ions

237 formula(e) evaluated with 2 results within limits (up to 50 closest results for each mass)

Elements Used:

| Mass     | Calc. Mass | mDa  | PPM  | DBE  | Formula                                         | i-FIT | i-FIT Norm | Fit Conf % | C  | H  | O  |
|----------|------------|------|------|------|-------------------------------------------------|-------|------------|------------|----|----|----|
| 717.1453 | 717.1456   | -0.3 | -0.4 | 22.5 | C <sub>36</sub> H <sub>29</sub> O <sub>16</sub> | 324.0 | 0.350      | 70.47      | 36 | 29 | 16 |
|          | 717.1421   | 3.2  | 4.5  | 0.5  | C <sub>18</sub> H <sub>37</sub> O <sub>29</sub> | 324.9 | 1.220      | 29.53      | 18 | 37 | 29 |

**Figure S16.** Identification of compound **2** by UPLC-QToF MS.

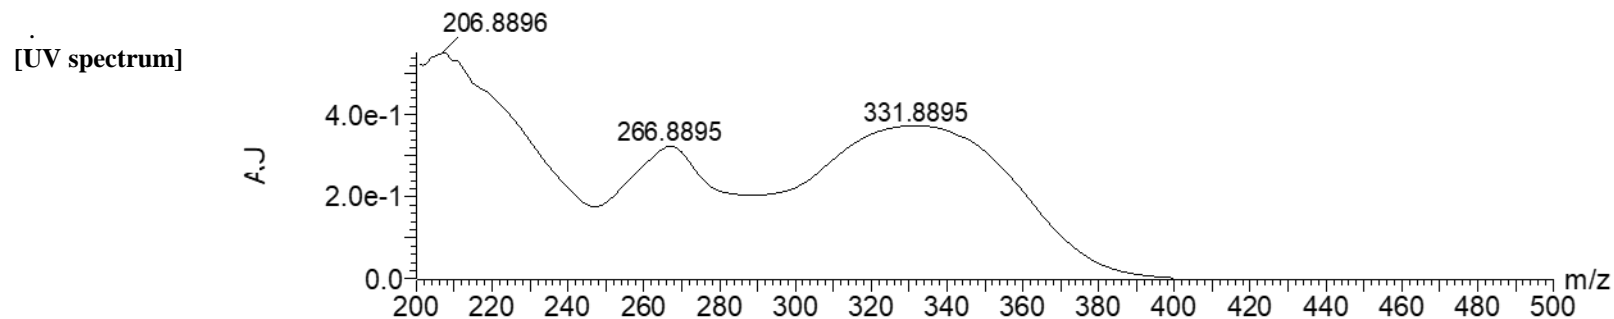

[MS Chromatogram]  
positive

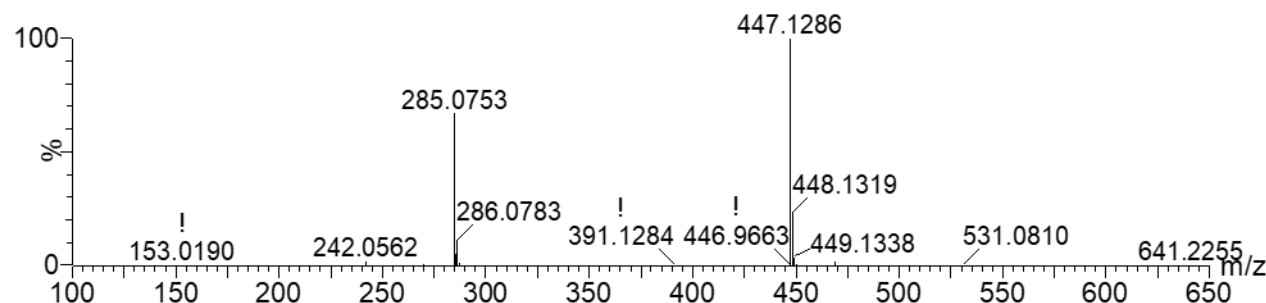

[MS/MS Chromatogram]  
positive

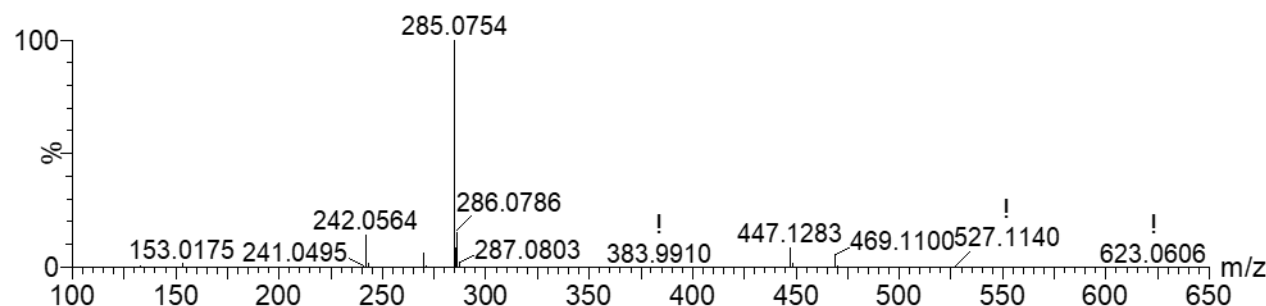

Elemental Composition:  
[HR-ESI/MS] positive

#### Single Mass Analysis

Tolerance = 5.0 PPM / DBE: min = -1.5, max = 50.0

Element prediction: Off

Number of isotope peaks used for i-FIT = 3

Monoisotopic Mass, Even Electron Ions

108 formula(e) evaluated with 1 results within limits (up to 50 closest results for each mass)

Elements Used:

| Mass     | Calc. Mass | mDa  | PPM  | DBE  | Formula                                         | i-FIT | i-FIT Norm | Fit Conf % | C  | H  | O  |
|----------|------------|------|------|------|-------------------------------------------------|-------|------------|------------|----|----|----|
| 447.1286 | 447.1291   | -0.5 | -1.1 | 11.5 | C <sub>22</sub> H <sub>23</sub> O <sub>10</sub> | 554.5 | n/a        | n/a        | 22 | 23 | 10 |

**Figure S17.** Identification of compound **3** by UPLC-QToF MS.

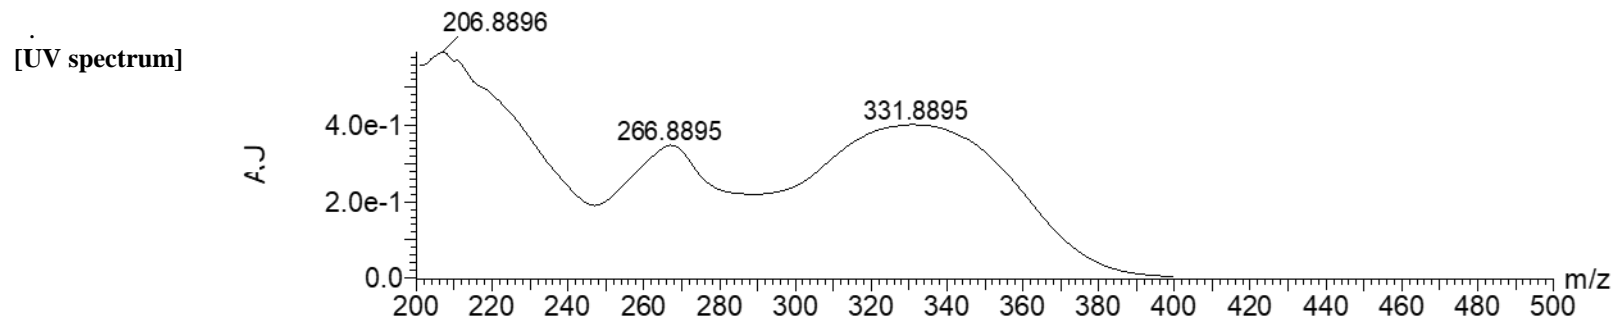

[MS Chromatogram]  
positive

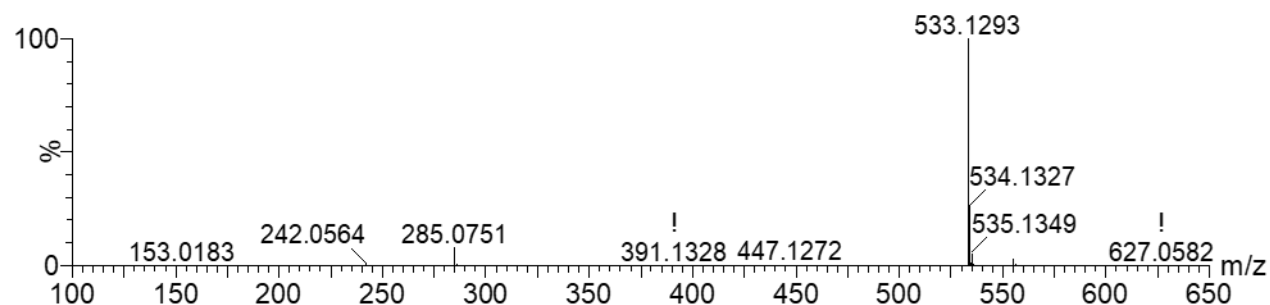

[MS/MS Chromatogram]  
positive

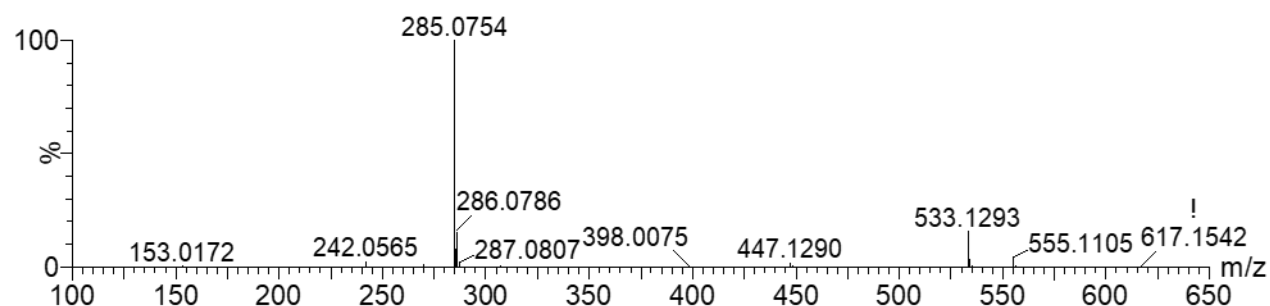

Elemental Composition:  
[HR-ESI/MS] positive

#### Single Mass Analysis

Tolerance = 5.0 PPM / DBE: min = -1.5, max = 50.0

Element prediction: Off

Number of isotope peaks used for i-FIT = 3

Monoisotopic Mass, Even Electron Ions

141 formula(e) evaluated with 1 results within limits (up to 50 closest results for each mass)

Elements Used:

| Mass     | Calc. Mass | mDa  | PPM  | DBE  | Formula                                         | i-FIT | i-FIT Norm | Fit Conf % | C  | H  | O  |
|----------|------------|------|------|------|-------------------------------------------------|-------|------------|------------|----|----|----|
| 533.1293 | 533.1295   | -0.2 | -0.4 | 13.5 | C <sub>25</sub> H <sub>25</sub> O <sub>13</sub> | 669.7 | n/a        | n/a        | 25 | 25 | 13 |

**Figure S18.** Identification of compound **4** by UPLC-QToF MS.

[UV spectrum]

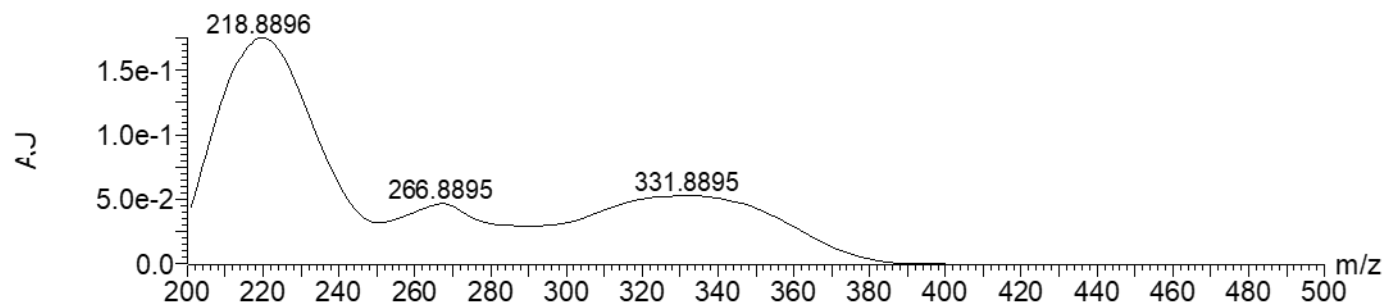

[MS Chromatogram]  
positive

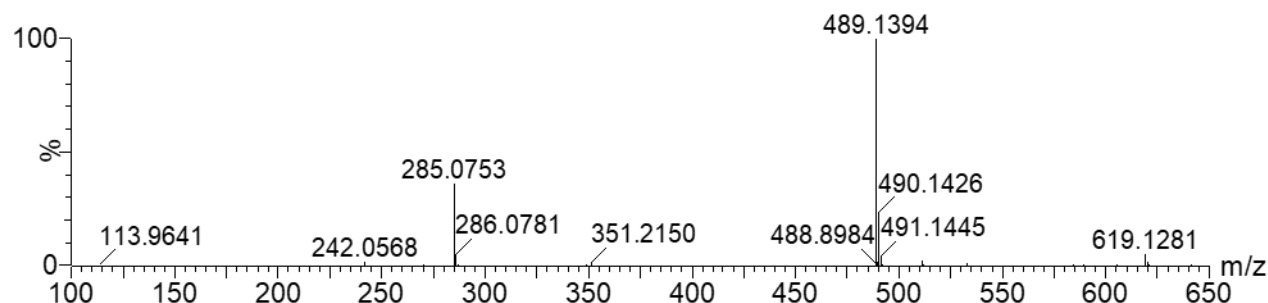

[MS/MS Chromatogram]  
positive

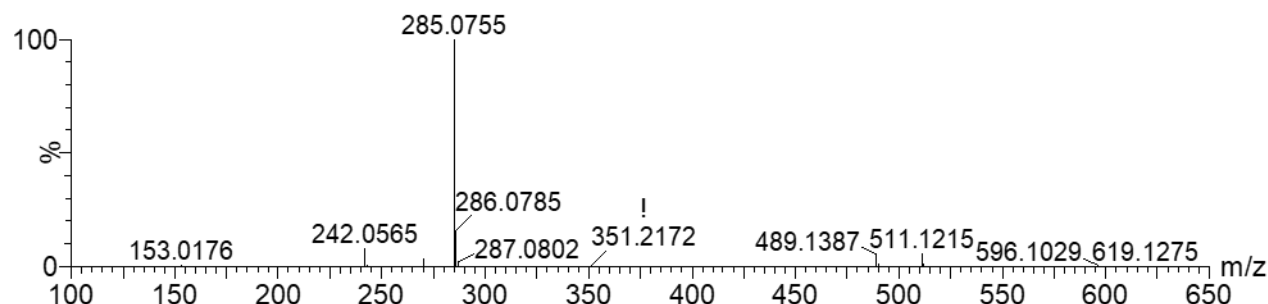

Elemental Composition:  
[HR-ESI/MS] positive

#### Single Mass Analysis

Tolerance = 5.0 PPM / DBE: min = -1.5, max = 50.0

Element prediction: Off

Number of isotope peaks used for i-FIT = 3

Monoisotopic Mass, Even Electron Ions

121 formula(e) evaluated with 1 results within limits (up to 50 closest results for each mass)

Elements Used:

| Mass     | Calc. Mass | mDa  | PPM  | DBE  | Formula                                         | i-FIT | i-FIT Norm | Fit Conf % | C  | H  | O  |
|----------|------------|------|------|------|-------------------------------------------------|-------|------------|------------|----|----|----|
| 489.1394 | 489.1397   | -0.3 | -0.6 | 12.5 | C <sub>24</sub> H <sub>25</sub> O <sub>11</sub> | 326.7 | n/a        | n/a        | 24 | 25 | 11 |

**Figure S19.** Identification of compound **5** by UPLC-QToF MS.

[UV spectrum]

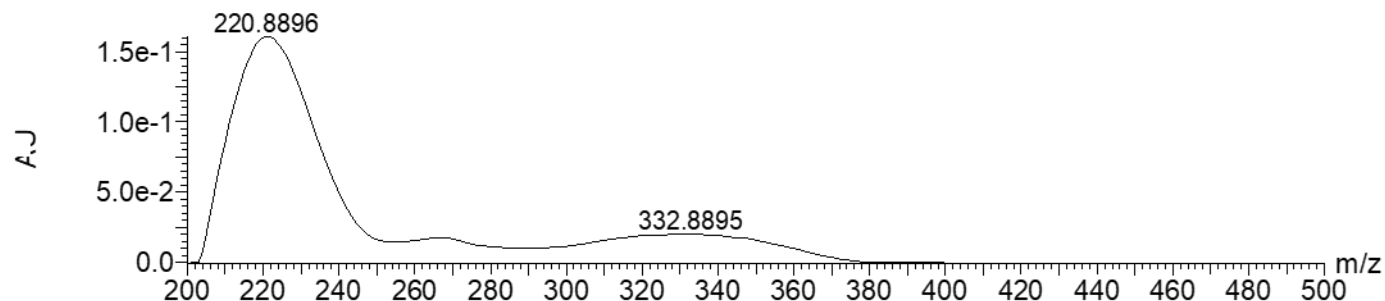

[MS Chromatogram]  
positive

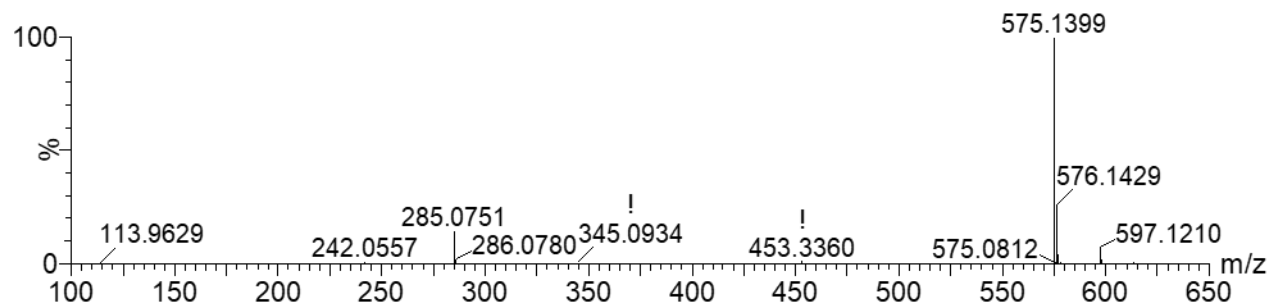

[MS/MS Chromatogram]  
positive

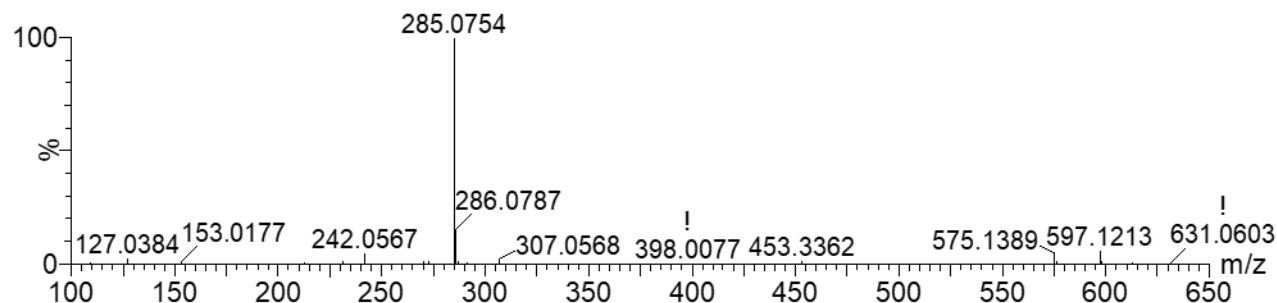

Elemental Composition:  
[HR-ESI/MS] positive

#### Single Mass Analysis

Tolerance = 5.0 PPM / DBE: min = -1.5, max = 50.0

Element prediction: Off

Number of isotope peaks used for i-FIT = 3

Monoisotopic Mass, Even Electron Ions

166 formula(e) evaluated with 1 results within limits (up to 50 closest results for each mass)

Elements Used:

| Mass     | Calc. Mass | mDa  | PPM  | DBE  | Formula     | i-FIT | i-FIT Norm | Fit Conf % | C  | H  | O  |
|----------|------------|------|------|------|-------------|-------|------------|------------|----|----|----|
| 575.1399 | 575.1401   | -0.2 | -0.3 | 14.5 | C27 H27 O14 | 353.2 | n/a        | n/a        | 27 | 27 | 14 |

**Figure S20.** Identification of compound **6** by UPLC-QToF MS.

[UV spectrum]

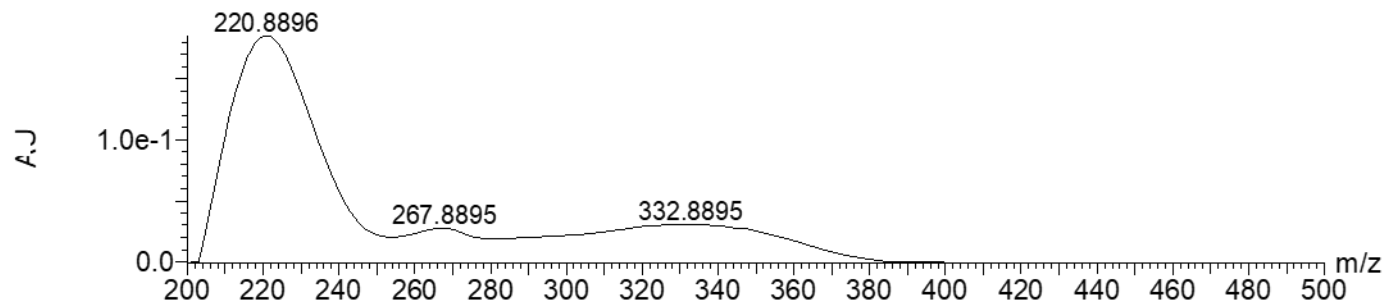

[MS Chromatogram]  
positive

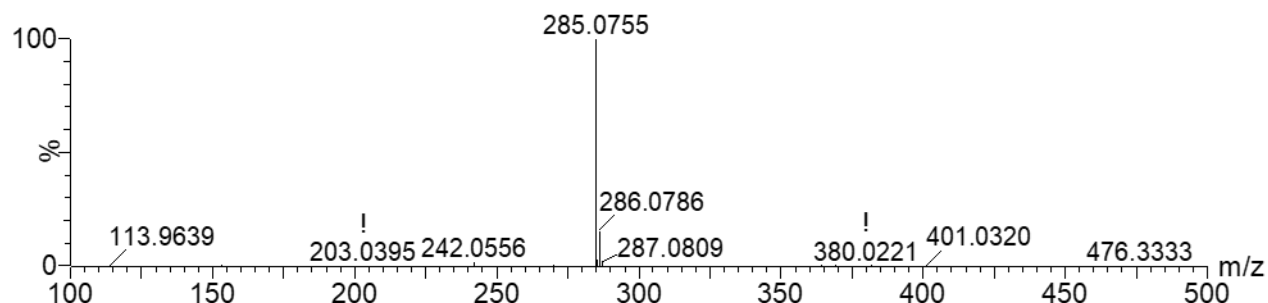

[MS/MS Chromatogram]  
positive

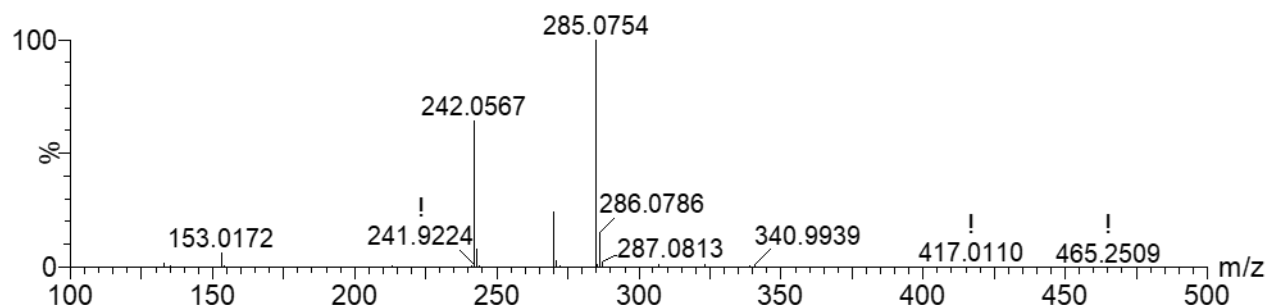

Elemental Composition:  
[HR-ESI/MS] positive

#### Single Mass Analysis

Tolerance = 5.0 PPM / DBE: min = -1.5, max = 50.0

Element prediction: Off

Number of isotope peaks used for i-FIT = 3

Monoisotopic Mass, Even Electron Ions

48 formula(e) evaluated with 1 results within limits (up to 50 closest results for each mass)

Elements Used:

| Mass     | Calc. Mass | mDa  | PPM  | DBE  | Formula                                        | i-FIT | i-FIT Norm | Fit Conf % | C  | H  | O |
|----------|------------|------|------|------|------------------------------------------------|-------|------------|------------|----|----|---|
| 285.0755 | 285.0763   | -0.8 | -2.8 | 10.5 | C <sub>16</sub> H <sub>13</sub> O <sub>5</sub> | 473.3 | n/a        | n/a        | 16 | 13 | 5 |

**Figure S21.** Identification of compound **7** by UPLC-QToF MS.

**Table S1.** <sup>1</sup>H- and <sup>13</sup>C-NMR assign of compounds (1–7).

| Comp. | assign                                                                                                                                                                                                                                                                                                                                                                                                                                                                                                                                                                                                                                                                                                                                                                                                                                                                                                                                                                                                                                          |
|-------|-------------------------------------------------------------------------------------------------------------------------------------------------------------------------------------------------------------------------------------------------------------------------------------------------------------------------------------------------------------------------------------------------------------------------------------------------------------------------------------------------------------------------------------------------------------------------------------------------------------------------------------------------------------------------------------------------------------------------------------------------------------------------------------------------------------------------------------------------------------------------------------------------------------------------------------------------------------------------------------------------------------------------------------------------|
| 1     | <sup>1</sup> H NMR (400 MHz, DMSO- <i>d</i> <sub>6</sub> ) $\delta_H$ 2.88 (1H, dd, <i>J</i> = 8.2 Hz, 8.2 Hz, H-7'b), 2.99 (1H, dd, <i>J</i> = 14.2 Hz, 4.2 Hz, H-7'a), 5.03 (1H, dd, <i>J</i> = 8.2 Hz, 4.2 Hz, H-8'), 6.24 (1H, d, <i>J</i> = 16.0 Hz, H-8), 6.53 (1H, dd, <i>J</i> = 8.0 Hz, 1.6 Hz, H-6'), 6.64 (1H, d, <i>J</i> = 8.0 Hz, H-5'), 6.68 (1H, d, <i>J</i> = 1.6 Hz, H-2'), 6.77 (1H, d, <i>J</i> = 8.0 Hz, H-5), 7.01 (1H, dd, <i>J</i> = 8.0 Hz, 1.2 Hz, H-6), 7.06 (1H, d, <i>J</i> = 1.2 Hz, H-2), 7.47 (1H, d, <i>J</i> = 15.8 Hz, H-7). <sup>13</sup> C NMR (DMSO- <i>d</i> <sub>6</sub> , 100 MHz) $\delta_C$ 36.12 (C-7), 72.82 (C-8'), 113.25 (C-2), 114.89 (C-8), 115.40 (C-5'), 115.77 (C-5), 116.70 (C-2'), 120.06 (C-6'), 121.61 (C-6), 125.36 (C-1), 127.28 (C-1'), 144.03 (C-3'), 144.94 (C-4'), 145.61 (C-3), 145.96 (C-7), 148.64 (C-4), 165.93 (C-9), 170.84 (C-9').                                                                                                                                        |
| 2     | <sup>1</sup> H NMR (500 MHz, CD <sub>3</sub> OD) $\delta_H$ 3.10-2.95 (4H, m, H-7'' $\alpha$ , 7'' $\beta$ , 7''' $\alpha$ , 7''' $\beta$ ), 4.40 (1H, d, <i>J</i> = 4.4 Hz, H-3), 5.11-5.20 (2H, m, H-8'', 8'''), 5.83 (1H, d, <i>J</i> = 4.4 Hz, H-2), 6.29 (1H, d, <i>J</i> = 16.0 Hz, H-11''), 6.46 (1H, dd, <i>J</i> = 2.0, 8.0 Hz, H-6''), 6.57-6.65 (8H, m, H-6''', 6', 5', 5'', 2'', 2', 2''', 5'''), 6.76 (1H, d, <i>J</i> = 8.4 Hz, H-6), 7.17 (1H, d, <i>J</i> = 16.0 Hz, H-5), 7.68 (1H, d, <i>J</i> = 16.0 Hz, H-12''). <sup>13</sup> C NMR (125 MHz, CD <sub>3</sub> OD) $\delta_C$ 172.4 (C-9''), 170.1 (C-10''), 168.1 (C-9'''), 166.9 (C-10'''), 148.9 (C-8), 146.5 (C-7), 146.4 (C-3''', 4'''), 145.9 (C-3', 4'), 145.1 (C-3'', 4''), 133.7 (C-1'), 129.2 (C-1''), 128.7 (C-1'''), 126.2 (C-9), 124.7 (C-4), 144.1 (C-12''), 121.9 (C-5, 6'', 6'''), 118.3 (C-6, 6'), 117.5 (C-2'', 2'''), 116.3 (C-5', 5'', 5''', 11''), 113.2 (C-2'), 88.8 (C-2), 74.4 (C-8''), 74.4 (C-8'''), 57.2 (C-3), 37.8 (C-7''), 37.2 (C-7''').     |
| 3     | <sup>1</sup> H NMR (400 MHz, DMSO- <i>d</i> <sub>6</sub> ) $\delta_H$ 3.16-3.72 (6H, m, Glc-H), 3.86 (3H, s, 4'-OCH <sub>3</sub> ), 5.07 (1H, d, <i>J</i> = 7.6 Hz, H-1''), 6.45 (1H, d, <i>J</i> = 2.0 Hz, H-6), 6.85 (1H, d, <i>J</i> = 2.0 Hz, H-8), 6.95 (1H, s, H-3), 7.13 (2H, d, <i>J</i> = 8.0 Hz, H-3', H-5'), 8.06 (2H, d, <i>J</i> = 8.0 Hz, H-2', H-6'), 12.91 (1H, br s, 5-OH). <sup>13</sup> C NMR (DMSO- <i>d</i> <sub>6</sub> , 100 MHz) $\delta_C$ 55.59 (4'-OCH <sub>3</sub> ), 60.60 (C-6''), 69.54 (C-4''), 73.10 (C-2''), 76.44 (C-5''), 77.19 (C-3''), 94.86 (C-8), 99.58 (C-6), 99.90 (C-1''), 103.81 (C-3), 105.41 (C-10), 114.62 (C-3', C-5'), 122.68 (C-1'), 128.43 (C-2', C-6'), 156.98 (C-5), 161.17 (C-4'), 162.45 (C-9), 163.02 (C-2), 163.77 (C-7), 182.02 (C-4).                                                                                                                                                                                                                                                |
| 4     | <sup>1</sup> H NMR (400 MHz, DMSO- <i>d</i> <sub>6</sub> ) $\delta_H$ 3.15-3.80 (4H, m, Glc-H), 3.39 (2H, s, H-2''), 3.85 (3H, s, 4'-OCH <sub>3</sub> ), 4.12 (1H, dd, <i>J</i> = 11.8 Hz, 6.8 Hz, H-6'a), 4.41 (1H, dd, <i>J</i> = 11.8 Hz, 1.6 Hz, H-6'b), 5.11 (1H, d, <i>J</i> = 7.2 Hz, H-1''), 6.44 (1H, d, <i>J</i> = 2.0 Hz, H-6), 6.84 (1H, d, <i>J</i> = 2.0 Hz, H-8), 6.95 (1H, s, H-3), 7.12 (2H, d, <i>J</i> = 8.8 Hz, H-3', H-5'), 8.07 (2H, d, <i>J</i> = 8.8 Hz, H-2', H-6'), 12.92 (1H, br s, 5-OH). <sup>13</sup> C NMR (DMSO- <i>d</i> <sub>6</sub> , 100 MHz) $\delta_C$ 41.37 (C-2''), 55.61 (4'-OCH <sub>3</sub> ), 64.11 (C-6''), 69.61 (C-4''), 73.00 (C-2'), 73.85 (C-3''), 76.17 (C-5''), 94.80 (C-8), 99.62 (C-6, C-1'), 103.40 (C-3), 105.53 (C-10), 112.70 (C-1'), 114.64 (C-3', C-5'), 128.46 (C-2', C-6'), 157.04 (C-5), 161.08 (C-4'), 162.47 (C-9), 162.75 (C-2), 163.92 (C-7), 166.82 (C-1'''), 167.82 (C-3'''), 182.09 (C-4).                                                                                |
| 5     | <sup>1</sup> H NMR (400 MHz, DMSO- <i>d</i> <sub>6</sub> ) $\delta_H$ 2.04 (3H, s, H-2''), 3.15-3.80 (5H, m, Glc-H), 3.86 (3H, s, 4'-OCH <sub>3</sub> ), 4.81 (1H, dd, <i>J</i> = 9.4 Hz, 8.2 Hz, H-2''), 5.39 (1H, d, <i>J</i> = 7.6 Hz, H-1''), 6.42 (1H, d, <i>J</i> = 2.0 Hz, H-6), 6.81 (1H, d, <i>J</i> = 2.0 Hz, H-8), 6.95 (1H, s, H-3), 7.12 (2H, d, <i>J</i> = 8.8 Hz, H-3', H-5'), 8.06 (2H, d, <i>J</i> = 8.8 Hz, H-2', H-6'), 12.93 (1H, br s, 5-OH). <sup>13</sup> C NMR (DMSO- <i>d</i> <sub>6</sub> , 100 MHz) $\delta_C$ 20.82 (C-2''), 55.60 (4'-OCH <sub>3</sub> ), 60.40 (C-6''), 69.60 (C-4''), 73.33 (C-2''), 73.75 (C-5''), 77.36 (C-3''), 95.12 (C-8), 97.30 (C-1''), 99.34 (C-6), 103.78 (C-3), 105.65 (C-10), 114.61 (C-3', C-5'), 122.59 (C-1'), 128.45 (C-2', C-6'), 156.88 (C-5), 161.24 (C-4'), 162.28 (C-9), 162.49 (C-2), 163.86 (C-7), 169.31 (C-1'''), 182.04 (C-4).                                                                                                                                          |
| 6     | <sup>1</sup> H NMR (400 MHz, DMSO- <i>d</i> <sub>6</sub> ) $\delta_H$ 2.05 (3H, s, H-5'''), 3.30-3.95 (3H, m, Glc-H), 3.41 (2H, s, H-2'''), 3.86 (3H, s, 4'-OCH <sub>3</sub> ), 4.17 (1H, dd, <i>J</i> = 11.0 Hz, 6.8 Hz, H-6'a), 4.44 (1H, d, <i>J</i> = 11.0 Hz, H-6'b), 4.83 (1H, m, H-2''), 5.42 (1H, d, <i>J</i> = 8.0 Hz, H-1''), 6.40 (1H, d, <i>J</i> = 2.0 Hz, H-6), 6.79 (1H, d, <i>J</i> = 2.0 Hz, H-8), 6.96 (1H, s, H-3), 7.12 (2H, d, <i>J</i> = 8.8 Hz, H-3', H-5'), 8.06 (2H, d, <i>J</i> = 8.8 Hz, H-2', H-6'), 12.94 (1H, br s, 5-OH). <sup>13</sup> C NMR (DMSO- <i>d</i> <sub>6</sub> , 100 MHz) $\delta_C$ 20.79 (C-2'''), 41.33 (C-2'''), 55.58 (4'-OCH <sub>3</sub> ), 63.87 (C-6''), 69.64 (C-4''), 73.07 (C-2''), 73.47 (C-3''), 73.95 (C-5''), 94.99 (C-8), 97.06 (C-1''), 99.40 (C-6), 103.81 (C-3), 105.77 (C-10), 114.60 (C-3', C-5'), 122.61 (C-1'), 128.46 (C-2', C-6'), 156.93 (C-5), 161.22 (C-4'), 162.01 (C-9), 162.48 (C-2), 163.94 (C-7), 166.77 (C-1'''), 167.79 (C-3'''), 169.30 (C-1'''), 182.09 (C-4). |
| 7     | <sup>1</sup> H NMR (400 MHz, DMSO- <i>d</i> <sub>6</sub> ) $\delta_H$ 3.85 (3H, s, 4'-OCH <sub>3</sub> ), 6.19 (1H, d, <i>J</i> = 1.8 Hz, H-6), 6.49 (1H, d, <i>J</i> = 1.8 Hz, H-8), 6.85 (1H, s, H-3), 7.10 (2H, d, <i>J</i> = 8.8 Hz, H-3', H-5'), 8.02 (2H, d, <i>J</i> = 8.8 Hz, H-2', H-6'), 12.92 (1H, br s, 5-OH). <sup>13</sup> C NMR (DMSO- <i>d</i> <sub>6</sub> , 100 MHz) $\delta_C$ 55.54 (4'-OCH <sub>3</sub> ), 94.03 (C-8), 98.91 (C-6), 103.51 (C-3), 103.70 (C-10), 114.55 (C-3', C-5'), 122.82 (C-1'), 128.28 (C-2', C-6'), 157.33 (C-5), 161.43 (C-4'), 162.27 (C-9), 163.24 (C-2), 164.34 (C-7), 181.73 (C-4).                                                                                                                                                                                                                                                                                                                                                                                                            |
